# Supplementary material for: Hydroperfluoroalkylation of electron-deficient olefins with perfluoroalkyl iodides promoted by zinc/viologen
Source: Royal Society of Chemistry journal article supplement (doi:10.1039/c6ra11557h), 2016-01-01

## Supporting Information

### Hydroperfluoroalkylation of electron-deficient olefins with perfluoroalkyl iodides promoted by Zinc / viologen

Sheng-Hua Zhou,<sup>a,b,c</sup> Jin-Hong Lin,<sup>b,c</sup> Gang Zhao,<sup>b,c</sup> Ji-Chang Xiao<sup>\*b,c</sup> and Wei-Guo  
Cao<sup>\*a,b</sup>

<sup>a</sup>Department of Chemistry, Shanghai University, 99 Shangda Road, Shanghai 200444, China.

<sup>b</sup>Key Laboratory of Organofluorine Chemistry, Shanghai Institute of Organic Chemistry, Chinese Academy of Sciences, 345 Lingling Road, Shanghai 200032, China

<sup>c</sup>University of Chinese Academy of Sciences, Beijing 100049, China.

Email: wgcao@staff.shu.edu.cn; jchxiao@sioc.ac.cn

#### Contents

|                                                                                           |    |
|-------------------------------------------------------------------------------------------|----|
| 1. General information.....                                                               | S2 |
| 2. The procedure for the synthesis of butyl viologen.....                                 | S2 |
| 3. The general procedure for the hydroperfluoroalkylation reaction.....                   | S2 |
| 4. References.....                                                                        | S7 |
| 5. Copies of <sup>1</sup> H NMR, <sup>19</sup> F NMR and <sup>13</sup> C NMR spectra..... | S9 |

### 1. General information

Solvents and reagents were purchased from commercial sources and used as received unless otherwise noted. Acetonitrile and Chloroform were distilled from CaH<sub>2</sub>. <sup>1</sup>H, <sup>13</sup>C and <sup>19</sup>F NMR spectra were detected on a 500 MHz, 400 MHz or 300 MHz NMR spectrometer. Data for <sup>1</sup>H, <sup>13</sup>C and <sup>19</sup>F NMR were recorded as follows: chemical shift (δ, ppm), multiplicity (s = singlet, d = doublet, t = triplet, m = multiplet, q = quartet, coupling constant (s) in Hz). Mass spectra were obtained on a GC-MS. High resolution mass data were recorded on a high resolution mass spectrometer in the EI or ESI mode.

### 2. The procedure for the synthesis of butyl viologen

A mixture of 4,4'-dipyridyl (9.0g, 57.7mmol) and butyl bromide (31.6g, 231mmol) in CH<sub>3</sub>CN (100ml) was refluxed for 24h. The resulting precipitate was filtered, washed with hot chloroform and then dried under vacuum to give the pure product.

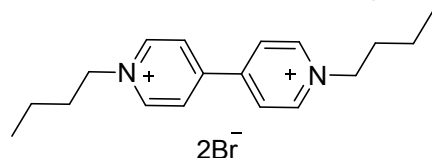

1,1'-dibutyl-[4,4'-bipyridine]-1,1'-dium: <sup>1</sup>H NMR (400 MHz, D<sub>2</sub>O) δ 9.10 (d, *J* = 6.6 Hz, 4 H, Ar-H), 8.52 (d, *J* = 6.1 Hz, 4 H, Ar-H), 4.71 (t, *J* = 7.4 Hz, 4 H, CH<sub>2</sub>CH<sub>2</sub>CH<sub>2</sub>CH<sub>3</sub>), 2.12 – 1.97 (m, 4 H, CH<sub>2</sub>CH<sub>2</sub>CH<sub>2</sub>CH<sub>3</sub>), 1.45 – 1.31 (m, 4 H, CH<sub>2</sub>CH<sub>2</sub>CH<sub>2</sub>CH<sub>3</sub>), 0.94 (t, *J* = 7.4 Hz, 6 H, CH<sub>2</sub>CH<sub>2</sub>CH<sub>2</sub>CH<sub>3</sub>).

### 3. The general procedure for the hydroperfluoroalkylation reaction

Into a mixture of olefin (0.2 mmol), zinc powder (78 mg, 1.2 mmol) (median 6-9 micron) and butyl viologen (172 mg, 0.4 mmol) in a sealed tube was added anhydrous chloroform (2 mL) and perfluoroalkyl iodide (0.6 mmol) under N<sub>2</sub> atmosphere. The tube was sealed and the resulting mixture was stirred at 110 °C for 4 h. After being cooled to room temperature, the solvent was removed by concentration, and the residue was subjected to flash column chromatography to afford the pure product.

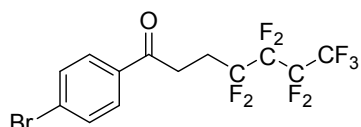

**3a**

1-(4-bromophenyl)-4,4,5,5,6,6,7,7,7-nonafluoroheptan-1-one (**3a**): 62% yield, yellow solid. <sup>1</sup>H NMR (400 MHz, CDCl<sub>3</sub>) δ 7.84 (d, *J* = 8.6 Hz, 2H, Ar-H), 7.63 (d, *J* = 8.6 Hz, 2H, Ar-H), 3.32 – 3.23 (m, 2H, COCH<sub>2</sub>), 2.66 – 2.53 (m, 2H, CH<sub>2</sub>CF<sub>2</sub>). <sup>19</sup>F NMR (376 MHz, CDCl<sub>3</sub>) δ -81.17 (tt, *J* = 9.6, 3.2 Hz, 3F, CF<sub>2</sub>CF<sub>3</sub>), -114.34 – -114.62 (m, 2F, CH<sub>2</sub>CF<sub>2</sub>), -124.38 – -124.61 (m, 2F, CF<sub>2</sub>CF<sub>2</sub>CF<sub>2</sub>), -126.01 – -126.23 (m, 2F, CF<sub>2</sub>CF<sub>3</sub>). <sup>13</sup>C NMR (101 MHz, CDCl<sub>3</sub>) δ 195.33 (s, CO), 134.83 (s, C<sub>Ar</sub>), 132.12 (s, C<sub>Ar</sub>), 129.48 (s, C<sub>Ar</sub>), 128.89 (s, C<sub>Ar</sub>), 29.47 (t, *J* = 2.9 Hz, COCH<sub>2</sub>), 25.39 (t, *J* = 21.9 Hz, CH<sub>2</sub>CF<sub>2</sub>). IR (neat) ν = 1687, 1587, 1334, 1220, 1132, 982, 722, 529 cm<sup>-1</sup>. HRMS (EI) Calcd. for C<sub>13</sub>H<sub>8</sub>BrF<sub>9</sub>O [M<sup>+</sup>]: 429.9615, found 429.9610.

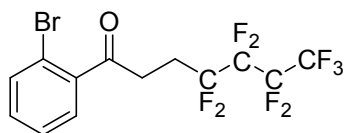

**3b**

1-(2-bromophenyl)-4,4,5,5,6,6,7,7,7-nonafluoroheptan-1-one (**3b**): 50% yield, yellow liquid.

$^1\text{H}$  NMR (400 MHz,  $\text{CDCl}_3$ )  $\delta$  7.64 (dd,  $J = 8.1, 0.7$  Hz, 1H, Ar-H), 7.45 – 7.31 (m, 3H, Ar-H), 3.30 – 3.23 (m, 2H,  $\text{COCH}_2$ ), 2.67 – 2.54 (m, 2H,  $\text{CH}_2\text{CF}_2$ ).  $^{19}\text{F}$  NMR (376 MHz,  $\text{CDCl}_3$ )  $\delta$  -81.11 (tt,  $J = 9.6, 3.2$  Hz, 3F,  $\text{CF}_2\text{CF}_3$ ), -114.35 – -114.61 (m, 2F,  $\text{CH}_2\text{CF}_2$ ), -124.45 – -124.47 (m, 2F,  $\text{CF}_2\text{CF}_2\text{CF}_2$ ), -126.05 – -126.16 (m, 2F,  $\text{CF}_2\text{CF}_3$ ).  $^{13}\text{C}$  NMR (101 MHz,  $\text{CDCl}_3$ )  $\delta$  200.29 (s, CO), 140.69 (s,  $\text{C}_{\text{Ar}}$ ), 133.90 (s,  $\text{C}_{\text{Ar}}$ ), 132.10 (s,  $\text{C}_{\text{Ar}}$ ), 128.58 (s,  $\text{C}_{\text{Ar}}$ ), 127.59 (s,  $\text{C}_{\text{Ar}}$ ), 118.77 (s,  $\text{C}_{\text{Ar}}$ ), 33.48 (t,  $J = 2.9$  Hz,  $\text{COCH}_2$ ), 25.52 (t,  $J = 22.1$  Hz,  $\text{CH}_2\text{CF}_2$ ). IR (neat)  $\nu = 1709, 1589, 1430, 1224, 1134, 975, 882, 753$   $\text{cm}^{-1}$ . HRMS (EI) Calcd. for  $\text{C}_{13}\text{H}_8\text{BrF}_9\text{O}$  [ $\text{M}^+$ ]: 429.9615, found 429.9618.

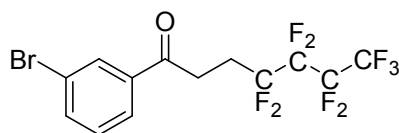

**3c**

1-(3-bromophenyl)-4,4,5,5,6,6,7,7,7-nonafluoroheptan-1-one (**3c**): 54% yield, yellow solid.

$^1\text{H}$  NMR (400 MHz,  $\text{CDCl}_3$ )  $\delta$  8.10 (s, 1H, Ar-H), 7.90 (d,  $J = 7.8$  Hz, 1H, Ar-H), 7.73 (dd,  $J = 8.0, 0.9$  Hz, 1H, Ar-H), 7.38 (t,  $J = 7.9$  Hz, 1H, Ar-H), 3.32 – 3.23 (m, 2H,  $\text{COCH}_2$ ), 2.68 – 2.52 (m, 2H,  $\text{CH}_2\text{CF}_2$ ).  $^{19}\text{F}$  NMR (376 MHz,  $\text{CDCl}_3$ )  $\delta$  -81.13 (tt,  $J = 9.6, 3.1$  Hz, 3F,  $\text{CF}_2\text{CF}_3$ ), -114.40 – -114.57 (m, 2F,  $\text{CH}_2\text{CF}_2$ ), -124.46 – -124.51 (m, 2F,  $\text{CF}_2\text{CF}_2\text{CF}_2$ ), -126.10 – -126.15 (m, 2F,  $\text{CF}_2\text{CF}_3$ ).  $^{13}\text{C}$  NMR (101 MHz,  $\text{CDCl}_3$ )  $\delta$  195.04 (s, CO), 137.79 (s,  $\text{C}_{\text{Ar}}$ ), 136.50 (s,  $\text{C}_{\text{Ar}}$ ), 131.09 (s,  $\text{C}_{\text{Ar}}$ ), 130.37 (s,  $\text{C}_{\text{Ar}}$ ), 126.53 (s,  $\text{C}_{\text{Ar}}$ ), 123.18 (s,  $\text{C}_{\text{Ar}}$ ), 29.61 (t,  $J = 2.9$  Hz,  $\text{COCH}_2$ ), 25.34 (t,  $J = 21.9$  Hz,  $\text{CH}_2\text{CF}_2$ ). IR (neat)  $\nu = 1691, 1570, 1329, 1213, 1132, 1099, 979, 770, 676, 528$   $\text{cm}^{-1}$ . HRMS (EI) Calcd. for  $\text{C}_{13}\text{H}_8\text{BrF}_9\text{O}$  [ $\text{M}^+$ ]: 429.9615, found 429.9617.

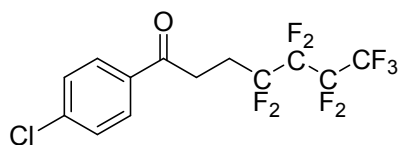

**3d**

1-(4-chlorophenyl)-4,4,5,5,6,6,7,7,7-nonafluoroheptan-1-one (**3d**): 78% yield, yellow solid.

$^1\text{H}$  NMR (400 MHz,  $\text{CDCl}_3$ )  $\delta$  7.92 (d,  $J = 8.6$  Hz, 2H, Ar-H), 7.47 (d,  $J = 8.6$  Hz, 2H, Ar-H), 3.31 – 3.24 (m, 2H,  $\text{COCH}_2$ ), 2.67 – 2.53 (m, 2H,  $\text{CH}_2\text{CF}_2$ ).  $^{19}\text{F}$  NMR (376 MHz,  $\text{CDCl}_3$ )  $\delta$  -81.15 (tt,  $J = 9.6, 3.1$  Hz, 3F,  $\text{CF}_2\text{CF}_3$ ), -112.48 – -117.92 (m, 2F,  $\text{CH}_2\text{CF}_2$ ), -124.50 (m, 2F,  $\text{CF}_2\text{CF}_2\text{CF}_2$ ), -125.94 – -126.29 (m, 2F,  $\text{CF}_2\text{CF}_3$ ).  $^{13}\text{C}$  NMR (101 MHz,  $\text{CDCl}_3$ )  $\delta$  195.15 (s, CO), 140.19 (s,  $\text{C}_{\text{Ar}}$ ), 134.42 (s,  $\text{C}_{\text{Ar}}$ ), 129.41 (s,  $\text{C}_{\text{Ar}}$ ), 129.12 (s,  $\text{C}_{\text{Ar}}$ ), 29.49 (t,  $J = 2.8$  Hz,  $\text{COCH}_2$ ), 25.40 (t,  $J = 21.9$  Hz,  $\text{CH}_2\text{CF}_2$ ). IR (neat)  $\nu = 1686, 1592, 1330, 1218, 1133, 1098, 983, 729, 526$   $\text{cm}^{-1}$ . HRMS (EI) Calcd. for  $\text{C}_{13}\text{H}_8\text{ClF}_9\text{O}$  [ $\text{M}^+$ ]: 386.0120, found 382.0119. Elem. Anal. Calcd. for

C<sub>13</sub>H<sub>8</sub>ClF<sub>9</sub>O: C, 40.38; H, 2.09; found C, 40.61; H, 2.19;

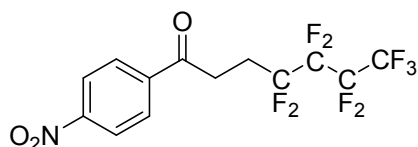

**3e**

4,4,5,5,6,6,7,7,7-nonafluoro-1-(4-nitrophenyl)heptan-1-one(**3e**): 38 % yield, pale yellow solid.

<sup>1</sup>H NMR (400 MHz, CDCl<sub>3</sub>) δ 8.34 (d, *J* = 8.9 Hz, 2H, Ar-H), 8.15 (d, *J* = 8.9 Hz, 2H, Ar-H), 3.41 – 3.32 (m, 2H, COCH<sub>2</sub>), 2.72 – 2.55 (m, 2H, CH<sub>2</sub>CF<sub>2</sub>). <sup>19</sup>F NMR (376 MHz, CDCl<sub>3</sub>) δ - 81.08 (tt, *J* = 9.6, 3.1 Hz, 3F, CF<sub>2</sub>CF<sub>3</sub>), -114.21 – -114.48 (m, 2F, CH<sub>2</sub>CF<sub>2</sub>), -124.30 – -124.48 (m, 2F, CF<sub>2</sub>CF<sub>2</sub>CF<sub>2</sub>), -125.92 – -126.12 (m, 2F, CF<sub>2</sub>CF<sub>3</sub>). <sup>13</sup>C NMR (101 MHz, CDCl<sub>3</sub>) δ 194.92 (s, CO), 150.68 (s, C<sub>Ar</sub>), 140.39 (s, C<sub>Ar</sub>), 129.10 (s, C<sub>Ar</sub>), 124.03 (s, C<sub>Ar</sub>), 30.18 (t, *J* = 3.2 Hz, COCH<sub>2</sub>), 25.30 (t, *J* = 21.9 Hz, CH<sub>2</sub>CF<sub>2</sub>). IR (neat) ν = 1697, 1604, 1530, 1350, 1269, 1224, 1133, 1100, 983, 857, 742 cm<sup>-1</sup>. HRMS (EI) Calcd. for C<sub>13</sub>H<sub>8</sub>F<sub>9</sub>NO<sub>3</sub> [M<sup>+</sup>]: 397.0360, found 397.0353.

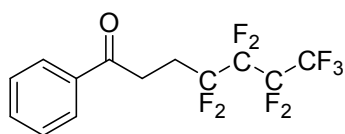

**3f**

4,4,5,5,6,6,7,7,7-nonafluoro-1-phenylheptan-1-one (**3f**): 71% yield, yellow solid.

<sup>1</sup>H NMR (400 MHz, CDCl<sub>3</sub>) δ 7.99 (d, *J* = 8.1 Hz, 2H, Ar-H), 7.60 (t, *J* = 7.4 Hz, 1H, Ar-H), 7.49 (t, *J* = 7.8 Hz, 2H, Ar-H), 3.35 – 3.25 (m, 2H, COCH<sub>2</sub>), 2.68 – 2.54 (m, 2H, CH<sub>2</sub>CF<sub>2</sub>). <sup>19</sup>F NMR (376 MHz, CDCl<sub>3</sub>) δ -81.21 (tt, *J* = 9.6, 2.9 Hz, 3F, CF<sub>2</sub>CF<sub>3</sub>), -114.42 – -114.59 (m, 2F, CH<sub>2</sub>CF<sub>2</sub>), -124.50 – -124.57 (m, 2F, CF<sub>2</sub>CF<sub>2</sub>CF<sub>2</sub>), -126.09 – -126.19 (m, 2F, CF<sub>2</sub>CF<sub>3</sub>). <sup>13</sup>C NMR (101 MHz, CDCl<sub>3</sub>) δ 196.35 (s, CO), 136.16 (s, C<sub>Ar</sub>), 133.58 (s, C<sub>Ar</sub>), 128.75 (s, C<sub>Ar</sub>), 127.99 (s, C<sub>Ar</sub>), 29.45 (t, *J* = 2.7 Hz, COCH<sub>2</sub>), 25.47 (t, *J* = 21.9 Hz, CH<sub>2</sub>CF<sub>2</sub>). IR (neat) ν = 1686, 1599, 1450, 1330, 1220, 1133, 1098, 744, 689 cm<sup>-1</sup>. HRMS (EI) Calcd. for C<sub>13</sub>H<sub>9</sub>F<sub>9</sub>O [M<sup>+</sup>]: 352.0510, found 352.0515. Elem. Anal. Calcd. for C<sub>13</sub>H<sub>9</sub>F<sub>9</sub>O: C, 44.33; H, 2.58; found C, 44.11; H, 2.61;

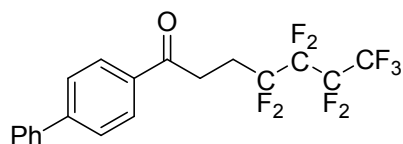

**3g**

1-([1,1'-biphenyl]-4-yl)-4,4,5,5,6,6,7,7,7-nonafluoroheptan-1-one (**3g**): 71% yield, yellow solid.

<sup>1</sup>H NMR (400 MHz, CDCl<sub>3</sub>) δ 8.06 (d, *J* = 8.3 Hz, 2H, Ar-H), 7.72 (d, *J* = 8.3 Hz, 2H, Ar-H), 7.64 (d, *J* = 7.5 Hz, 2H, Ar-H), 7.49 (t, *J* = 7.5 Hz, 2H, Ar-H), 7.42 (t, *J* = 7.3 Hz, 1H, Ar-H), 3.40 – 3.30 (m, 2H, COCH<sub>2</sub>), 2.70 – 2.57 (m, 2H, CH<sub>2</sub>CF<sub>2</sub>). <sup>19</sup>F NMR (376 MHz, CDCl<sub>3</sub>) δ -81.05 (t, *J* = 9.5 Hz, 3F, CF<sub>2</sub>CF<sub>3</sub>), -114.30 – -114.67 (m, 2F, CH<sub>2</sub>CF<sub>2</sub>), -124.46 (m, 2F, CF<sub>2</sub>CF<sub>2</sub>CF<sub>2</sub>), -

125.93 – -126.22 (m, 2F,  $\text{CF}_2\text{CF}_3$ ).  $^{13}\text{C}$  NMR (126 MHz,  $\text{CDCl}_3$ )  $\delta$  195.95 (s, CO), 146.33 (s,  $\text{C}_{\text{Ar}}$ ), 139.64 (s,  $\text{C}_{\text{Ar}}$ ), 134.79 (s,  $\text{C}_{\text{Ar}}$ ), 128.99 (s,  $\text{C}_{\text{Ar}}$ ), 128.61 (s,  $\text{C}_{\text{Ar}}$ ), 128.38 (s,  $\text{C}_{\text{Ar}}$ ), 127.38 (s,  $\text{C}_{\text{Ar}}$ ), 127.26 (s,  $\text{C}_{\text{Ar}}$ ), 29.50 (t,  $J = 2.7$  Hz,  $\text{COCH}_2$ ), 25.50 (t,  $J = 21.8$  Hz,  $\text{CH}_2\text{CF}_2$ ). IR (neat)  $\nu = 1682, 1607, 1334, 1262, 1220, 1131, 1098, 1022, 984, 801, 757, 739, 703$   $\text{cm}^{-1}$ . HRMS (EI) Calcd. for  $\text{C}_{19}\text{H}_{13}\text{F}_9\text{O}$  [ $\text{M}^+$ ]: 428.0823, found 428.0815.

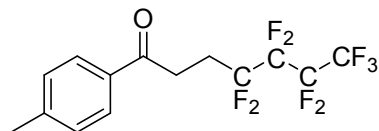

**3h**

4,4,5,5,6,6,7,7,7-nonafluoro-1-(p-tolyl)heptan-1-one (**3h**): 74% yield, yellow solid.

$^1\text{H}$  NMR (400 MHz,  $\text{CDCl}_3$ )  $\delta$  7.88 (d,  $J = 8.2$  Hz, 2H, Ar-H), 7.29 (d,  $J = 8.0$  Hz, 2H, Ar-H), 3.30 – 3.26 (m, 2H,  $\text{COCH}_2$ ), 2.66 – 2.53 (m, 2H,  $\text{CH}_2\text{CF}_2$ ), 2.42 (s, 3H,  $\text{CH}_3$ ).  $^{19}\text{F}$  NMR (376 MHz,  $\text{CDCl}_3$ )  $\delta$  -81.13 (tt,  $J = 9.6, 3.1$  Hz, 3F,  $\text{CF}_2\text{CF}_3$ ), -113.17 – -116.32 (m, 2F,  $\text{CH}_2\text{CF}_2$ ), -123.65 – -125.46 (m, 2F,  $\text{CF}_2\text{CF}_2\text{CF}_2$ ), -125.67 – -127.28 (m, 2F,  $\text{CF}_2\text{CF}_3$ ).  $^{13}\text{C}$  NMR (101 MHz,  $\text{CDCl}_3$ )  $\delta$  196.00 (s, CO), 144.53 (s,  $\text{C}_{\text{Ar}}$ ), 133.71 (s,  $\text{C}_{\text{Ar}}$ ), 129.43 (s,  $\text{C}_{\text{Ar}}$ ), 128.12 (s,  $\text{C}_{\text{Ar}}$ ), 29.30 (t,  $J = 2.7$  Hz,  $\text{COCH}_2$ ), 25.52 (t,  $J = 21.8$  Hz,  $\text{CH}_2\text{CF}_2$ ), 21.59 (s,  $\text{CH}_3$ ). IR (neat)  $\nu = 1681, 1607, 1216, 1189, 1135, 979, 741$   $\text{cm}^{-1}$ . HRMS (EI) Calcd. for  $\text{C}_{14}\text{H}_{11}\text{F}_9\text{O}$  [ $\text{M}^+$ ]: 366.0666, found 366.0661.

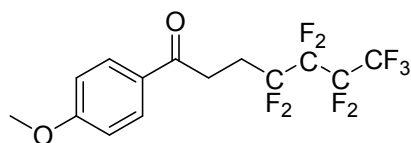

**3i**

4,4,5,5,6,6,7,7,7-nonafluoro-1-(4-methoxyphenyl)heptan-1-one (**3i**)<sup>2</sup>: 64% yield, pale yellow solid.

$^1\text{H}$  NMR (400 MHz,  $\text{CDCl}_3$ )  $\delta$  7.96 (d,  $J = 8.8$  Hz, 2H, Ar-H), 6.95 (d,  $J = 8.8$  Hz, 2H, Ar-H), 3.88 (s, 3H,  $\text{CH}_3\text{O}$ ), 3.28 – 3.22 (m, 2H,  $\text{COCH}_2$ ), 2.65 – 2.52 (m, 2H,  $\text{CH}_2\text{CF}_2$ ).  $^{19}\text{F}$  NMR (376 MHz,  $\text{CDCl}_3$ )  $\delta$  -81.13 (tt,  $J = 9.6, 3.1$  Hz, 3F,  $\text{CF}_2\text{CF}_3$ ), -114.28 – -114.68 (m, 2F,  $\text{CH}_2\text{CF}_2$ ), -124.47 – -124.50 (m, 2F,  $\text{CF}_2\text{CF}_2\text{CF}_2$ ), -126.06 – -126.15 (m, 2F,  $\text{CF}_2\text{CF}_3$ ).  $^{13}\text{C}$  NMR (101 MHz,  $\text{CDCl}_3$ )  $\delta$  194.87 (s, CO), 163.91 (s,  $\text{C}_{\text{Ar}}$ ), 130.31 (s,  $\text{C}_{\text{Ar}}$ ), 129.24 (s,  $\text{C}_{\text{Ar}}$ ), 113.90 (s,  $\text{C}_{\text{Ar}}$ ), 55.46 (s,  $\text{CH}_3\text{O}$ ), 29.02 (t,  $J = 3.1$  Hz,  $\text{COCH}_2$ ), 25.57 (t,  $J = 22.0$  Hz,  $\text{CH}_2\text{CF}_2$ ). HRMS (EI) Calcd. for  $\text{C}_{14}\text{H}_{11}\text{F}_9\text{O}_2$  [ $\text{M}^+$ ]: 382.0615, found 382.0613. Elem. Anal. Calcd. for  $\text{C}_{14}\text{H}_{11}\text{F}_9\text{O}_2$ : C, 43.99; H, 2.90; found C, 44.04; H, 3.03;

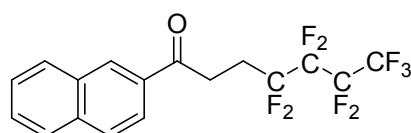

**3j**

4,4,5,5,6,6,7,7,7-nonafluoro-1-(naphthalen-2-yl)heptan-1-one (**3j**): 64% yield, yellow solid.

$^1\text{H}$  NMR (400 MHz,  $\text{CDCl}_3$ )  $\delta$  8.49 (s, 1H), 8.04 (dd,  $J = 8.6, 1.7$  Hz, 1H, Ar-H), 8.01 – 7.87 (m,

3H, Ar-H), 7.67 – 7.54 (m, 2H, Ar-H), 3.49 – 3.40 (m, 2H, COCH<sub>2</sub>), 2.73 – 2.60 (m, 2H, CH<sub>2</sub>CF<sub>2</sub>). <sup>19</sup>F NMR (376 MHz, CDCl<sub>3</sub>) δ -81.04 (tt, *J* = 9.6, 3.1 Hz, 3F, CF<sub>2</sub>CF<sub>3</sub>), -114.20 – -114.51 (m, 2F, CH<sub>2</sub>CF<sub>2</sub>), -124.26 – -124.51 (m, 2F, CF<sub>2</sub>CF<sub>2</sub>CF<sub>2</sub>), -125.95 – -126.09 (m, 2F, CF<sub>2</sub>CF<sub>3</sub>). <sup>13</sup>C NMR (101 MHz, CDCl<sub>3</sub>) δ 196.31 (s, CO), 135.82 (s, C<sub>Ar</sub>), 133.47 (s, C<sub>Ar</sub>), 132.48 (s, C<sub>Ar</sub>), 129.83 (s, C<sub>Ar</sub>), 129.62 (s, C<sub>Ar</sub>), 128.79 (s, C<sub>Ar</sub>), 128.71 (s, C<sub>Ar</sub>), 127.84 (s, C<sub>Ar</sub>), 127.01 (s, C<sub>Ar</sub>), 123.57 (s, C<sub>Ar</sub>), 29.55 (t, *J* = 2.8 Hz, COCH<sub>2</sub>), 25.59 (t, *J* = 22.0 Hz, CH<sub>2</sub>CF<sub>2</sub>). IR (neat)  $\nu$  = 1684, 1627, 1354, 1266, 1219, 1135, 1096, 978, 741, 705 cm<sup>-1</sup>. HRMS (EI) Calcd. for C<sub>17</sub>H<sub>11</sub>F<sub>9</sub>O [M<sup>+</sup>]: 402.0666, found 402.0668.

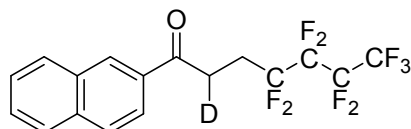

**D-3j**

4,4,5,5,6,6,7,7,7-nonafluoro-1-(naphthalen-2-yl)heptan-1-one-2-d (**D-3j**): 53% yield, yellow solid. <sup>1</sup>H NMR (400 MHz, CDCl<sub>3</sub>) δ 8.49 (s, 1H, Ar-H), 8.04 (dd, *J* = 8.6, 1.7 Hz, 1H, Ar-H), 8.01 – 7.86 (m, 3H, Ar-H), 7.65 – 7.56 (m, 2H, Ar-H), 3.46 – 3.40 (m, 1.39H, COCHD), 2.74 – 2.59 (m, 2H, CH<sub>2</sub>CF<sub>2</sub>). <sup>2</sup>H NMR (61 MHz, CHCl<sub>3</sub>) δ 3.61 (s, 1D, COCHD). <sup>19</sup>F NMR (376 MHz, CDCl<sub>3</sub>) δ -81.09 (tt, *J* = 9.5, 3.2 Hz, 3F, CF<sub>2</sub>CF<sub>3</sub>), -114.18 – -114.56 (m, 2F, CH<sub>2</sub>CF<sub>2</sub>), -124.31 – -124.54 (m, 2F, CF<sub>2</sub>CF<sub>2</sub>CF<sub>2</sub>), -125.95 – -126.17 (m, 2F, CF<sub>2</sub>CF<sub>3</sub>). HRMS (EI) Calcd. for C<sub>17</sub>H<sub>10</sub>DF<sub>9</sub>O [M<sup>+</sup>]: 403.0729, found 403.0728.

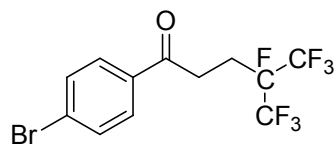

**3k**

1-(4-bromophenyl)-4,5,5,5-tetrafluoro-4-(trifluoromethyl)pentan-1-one (**3k**): 42% yield, brown liquid.

<sup>1</sup>H NMR (400 MHz, CDCl<sub>3</sub>) δ 7.82 (d, *J* = 8.6 Hz, 2H, Ar-H), 7.63 (d, *J* = 8.6 Hz, 2H, Ar-H), 3.28 – 3.19 (m, 2H, COCH<sub>2</sub>), 2.68 – 2.54 (m, 2H, CH<sub>2</sub>CF<sub>2</sub>). <sup>19</sup>F NMR (376 MHz, CDCl<sub>3</sub>) δ -76.59 (d, *J* = 6.8 Hz, 6F, CF<sub>3</sub>), -184.84 – -185.05 (m, 1F, CF). <sup>13</sup>C NMR (101 MHz, CDCl<sub>3</sub>) δ 195.34 (s, CO), 134.79 (s, C<sub>Ar</sub>), 132.14 (s, C<sub>Ar</sub>), 129.46 (s, C<sub>Ar</sub>), 128.92 (s, C<sub>Ar</sub>), 30.53 (s, COCH<sub>2</sub>), 22.79 (d, *J* = 20.3 Hz, CH<sub>2</sub>CF). IR (neat)  $\nu$  = 1694, 1587, 1400, 1351, 1286, 1224, 1158, 1072, 1004, 721 cm<sup>-1</sup>. HRMS (EI) Calcd. for C<sub>12</sub>H<sub>8</sub>BrF<sub>7</sub>O [M<sup>+</sup>]: 379.9647, found 379.9641.

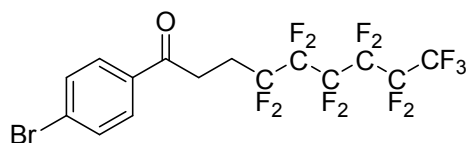

**3l**

1-(4-bromophenyl)-4,4,5,5,6,6,7,7,8,8,9,9,9-tridecafluorononan-1-one (**3l**): 54% yield, pale yellow

solid.

$^1\text{H}$  NMR (400 MHz,  $\text{CDCl}_3$ )  $\delta$  7.85 (d,  $J = 8.4$  Hz, 2H, Ar-H), 7.64 (d,  $J = 8.4$  Hz, 2H, Ar-H), 3.32 – 3.22 (m, 2H,  $\text{COCH}_2$ ), 2.67 – 2.53 (m, 2H,  $\text{CH}_2\text{CF}_2$ ).  $^{19}\text{F}$  NMR (376 MHz,  $\text{CDCl}_3$ )  $\delta$  -80.86 – -80.92 (m, 3F,  $\text{CF}_2\text{CF}_3$ ), -114.14 – -114.28 (m, 2F,  $\text{CF}_2\text{CF}_2\text{CF}_2\text{CF}_2\text{CF}_2\text{CF}_3$ ), -121.92 – -121.95 (m, 2F,  $\text{CF}_2\text{CF}_2\text{CF}_2\text{CF}_2\text{CF}_2\text{CF}_3$ ), -122.95 (s, 2F,  $\text{CF}_2\text{CF}_2\text{CF}_2\text{CF}_2\text{CF}_2\text{CF}_3$ ), -123.50 – -123.53 (m, 2F,  $\text{CF}_2\text{CF}_2\text{CF}_2\text{CF}_2\text{CF}_2\text{CF}_3$ ), -126.13 – -126.35 (m, 2F,  $\text{CF}_2\text{CF}_2\text{CF}_2\text{CF}_2\text{CF}_2\text{CF}_3$ ).  $^{13}\text{C}$  NMR (101 MHz,  $\text{CDCl}_3$ )  $\delta$  195.37 (s, CO), 134.83 (s,  $\text{C}_{\text{Ar}}$ ), 132.13 (s,  $\text{C}_{\text{Ar}}$ ), 129.50 (s,  $\text{C}_{\text{Ar}}$ ), 128.91 (s,  $\text{C}_{\text{Ar}}$ ), 29.50 (t,  $J = 2.9$  Hz,  $\text{COCH}_2$ ), 25.48 (t,  $J = 21.9$  Hz,  $\text{CH}_2\text{CF}_2$ ). IR (neat)  $\nu = 1685$ , 1589, 1334, 1239, 1140, 1096, 1120, 1013, 701  $\text{cm}^{-1}$ . HRMS (EI) Calcd. for  $\text{C}_{15}\text{H}_8\text{BrF}_{13}\text{O}$  [ $\text{M}^+$ ]: 529.9551, found 529.9546.

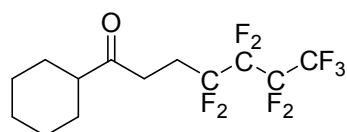

**3m**

1-cyclohexyl-4,4,5,5,6,6,7,7,7-nonafluoroheptan-1-one (**3m**): 76% yield, brown liquid.

$^1\text{H}$  NMR (400 MHz,  $\text{CDCl}_3$ )  $\delta$  2.80 – 2.68 (m, 2H,  $\text{COCH}_2$ ), 2.47 – 2.30 (m, 3H,  $\text{CH}_2\text{CF}_2$  and  $\text{CHCO}$ ), 1.92 – 1.60 (m, 5H,  $\text{C}_6\text{H}_{11}$ ), 1.43 – 1.13 (m, 5H,  $\text{C}_6\text{H}_{11}$ ).  $^{19}\text{F}$  NMR (376 MHz,  $\text{CDCl}_3$ )  $\delta$  -81.21 – -81.27 (m, 3F,  $\text{CF}_2\text{CF}_3$ ), -114.62 – -115.79 (m, 2F,  $\text{CH}_2\text{CF}_2$ ), -124.61 – -124.63 (m, 2F,  $\text{CF}_2\text{CF}_2\text{CF}_2$ ), -126.19 – -126.25 (m, 2F,  $\text{CF}_2\text{CF}_3$ ).  $^{13}\text{C}$  NMR (101 MHz,  $\text{CDCl}_3$ )  $\delta$  210.18 (s, CO), 50.86 (s,  $\text{CHCO}$ ), 31.03 (t,  $J = 2.6$  Hz,  $\text{COCH}_2$ ), 28.45 (s,  $\text{CH}_2\text{CH}_2\text{CH}_2\text{CH}_2\text{CH}_2$ ), 25.69 (s,  $\text{CH}_2\text{CH}_2\text{CH}_2\text{CH}_2\text{CH}_2$ ), 25.51 (s,  $\text{CH}_2\text{CH}_2\text{CH}_2\text{CH}_2\text{CH}_2$ ), 25.01 (t,  $J = 22.0$  Hz,  $\text{CH}_2\text{CF}_2$ ). IR (neat)  $\nu = 2935$ , 2859, 1716, 1453, 1355, 1235, 1134, 880  $\text{cm}^{-1}$ . HRMS (EI) Calcd. for  $\text{C}_{13}\text{H}_{15}\text{F}_9\text{O}$  [ $\text{M}^+$ ]: 358.0979, found 358.0976. Elem. Anal. Calcd. for  $\text{C}_{13}\text{H}_{15}\text{F}_9\text{O}$ : C, 43.58; H, 4.22; found C, 43.66; H, 4.07;

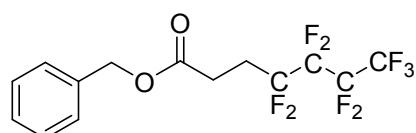

**3n**

benzyl 4,4,5,5,6,6,7,7,7-nonafluoroheptanoate (**3n**): 80% yield, yellow liquid.

$^1\text{H}$  NMR (400 MHz,  $\text{CDCl}_3$ )  $\delta$  7.39 – 7.36 (m, 5H, Ar-H), 5.18 (s, 2H,  $\text{PhCH}_2\text{O}$ ), 2.74 – 2.66 (m, 2H,  $\text{COCH}_2\text{CH}_2$ ), 2.57 – 2.44 (m, 2H,  $\text{CH}_2\text{CF}_2$ ).  $^{19}\text{F}$  NMR (376 MHz,  $\text{CDCl}_3$ )  $\delta$  -81.24 (tt,  $J = 9.6$ , 3.1 Hz, 3F,  $\text{CF}_2\text{CF}_3$ ), -115.04 – -115.27 (m, 2F,  $\text{CH}_2\text{CF}_2$ ), -124.50 – -124.71 (m, 2F,  $\text{CF}_2\text{CF}_2\text{CF}_2$ ), -126.11 – -126.32 (m, 2F,  $\text{CF}_2\text{CF}_3$ ).  $^{13}\text{C}$  NMR (101 MHz,  $\text{CDCl}_3$ )  $\delta$  170.91 (s, CO), 135.43 (s,  $\text{C}_{\text{Ar}}$ ), 128.63 (s,  $\text{C}_{\text{Ar}}$ ), 128.48 (s,  $\text{C}_{\text{Ar}}$ ), 128.35 (s,  $\text{C}_{\text{Ar}}$ ), 67.00 (s,  $\text{PhCH}_2\text{O}$ ), 26.44 (t,  $J = 22.2$  Hz,  $\text{CH}_2\text{CF}_2$ ), 25.49 (t,  $J = 4.1$  Hz,  $\text{COCH}_2\text{CH}_2$ ). IR (neat)  $\nu = 3034$ , 2950, 1742, 1457, 1351, 1235, 1135, 881, 745, 698  $\text{cm}^{-1}$ . HRMS (EI) Calcd. for  $\text{C}_{14}\text{H}_{11}\text{F}_9\text{O}_2$  [ $\text{M}^+$ ]: 382.0615, found 382.0613.

#### 4. References:

1. Y. Nakamura, S. Takeuchi, K. Okumura, Y. Ohgo, H. Matsuzawa and K. Mikami, *Tetrahedron*

*Lett.*, 2003, **44**, 6221-6225.

2. Z. Ye, K. E. Gettys, X. Shen and M. Dai, *Org. Lett.*, 2015, **17**, 6074-6077.



## 5. Copies of $^1\text{H}$ NMR, $^{19}\text{F}$ NMR and $^{13}\text{C}$ NMR spectra

$^1\text{H}$  NMR:

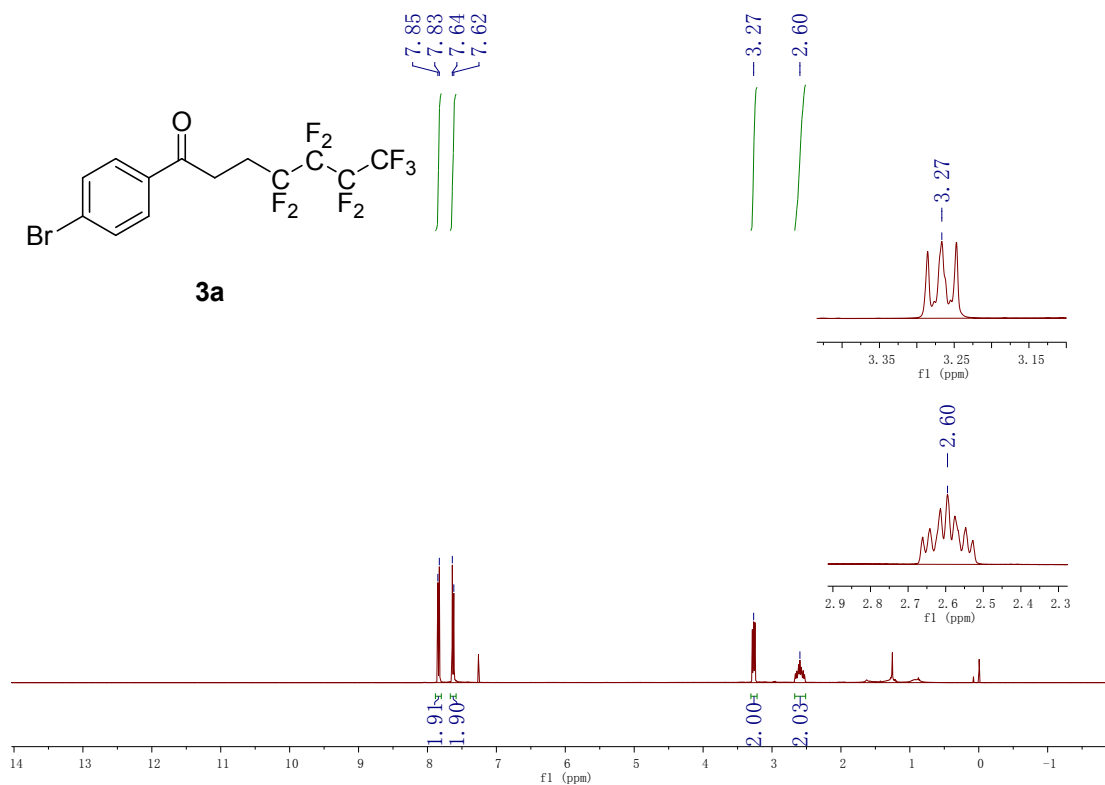

$^{19}\text{F}$  NMR:

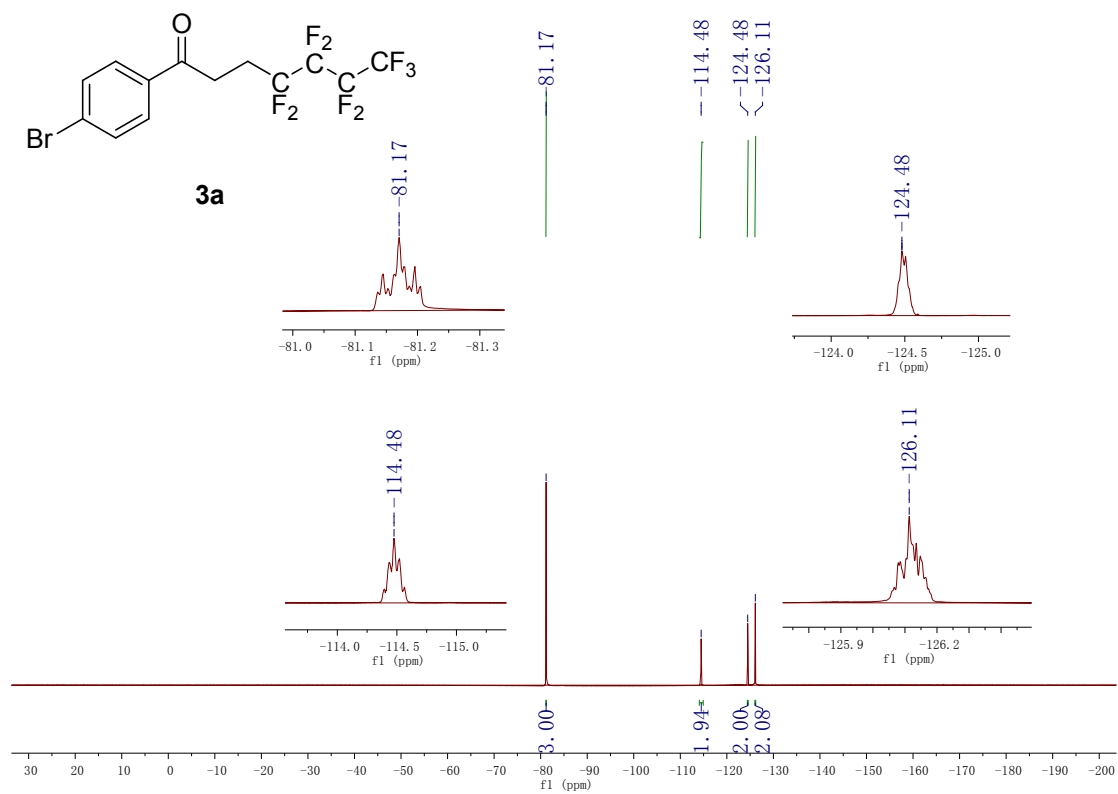

$^{13}\text{C}$  NMR:

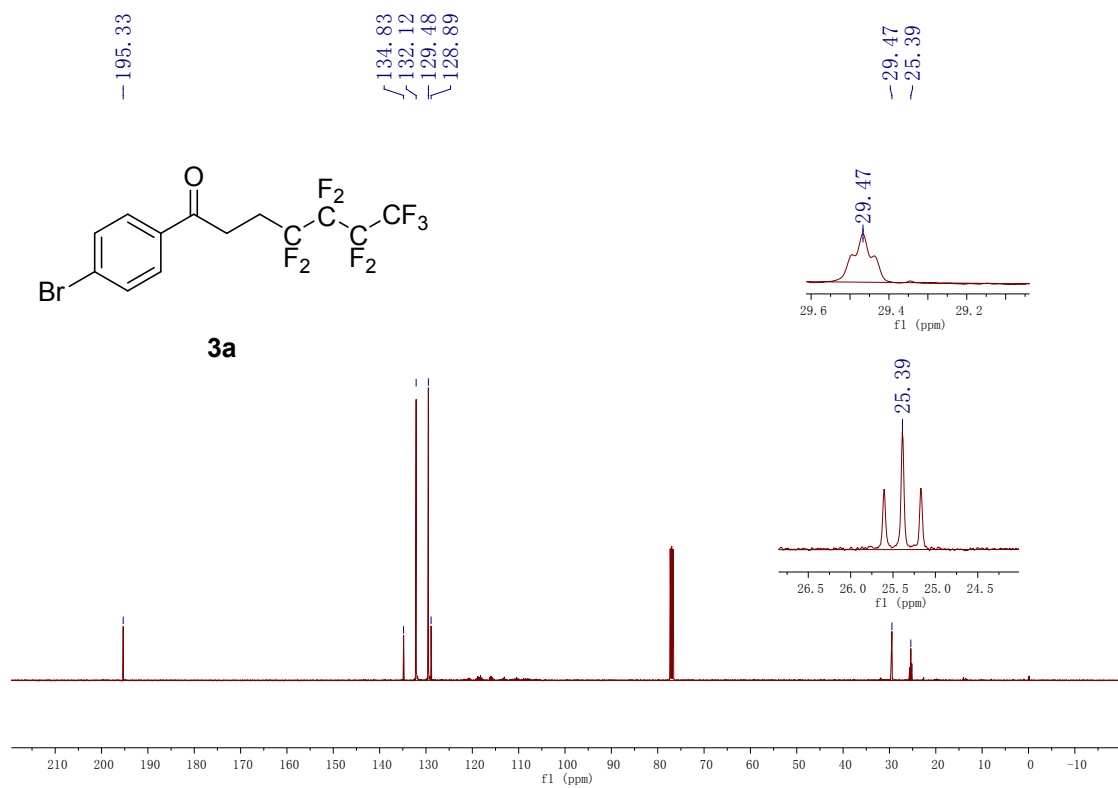

$^1\text{H}$  NMR:

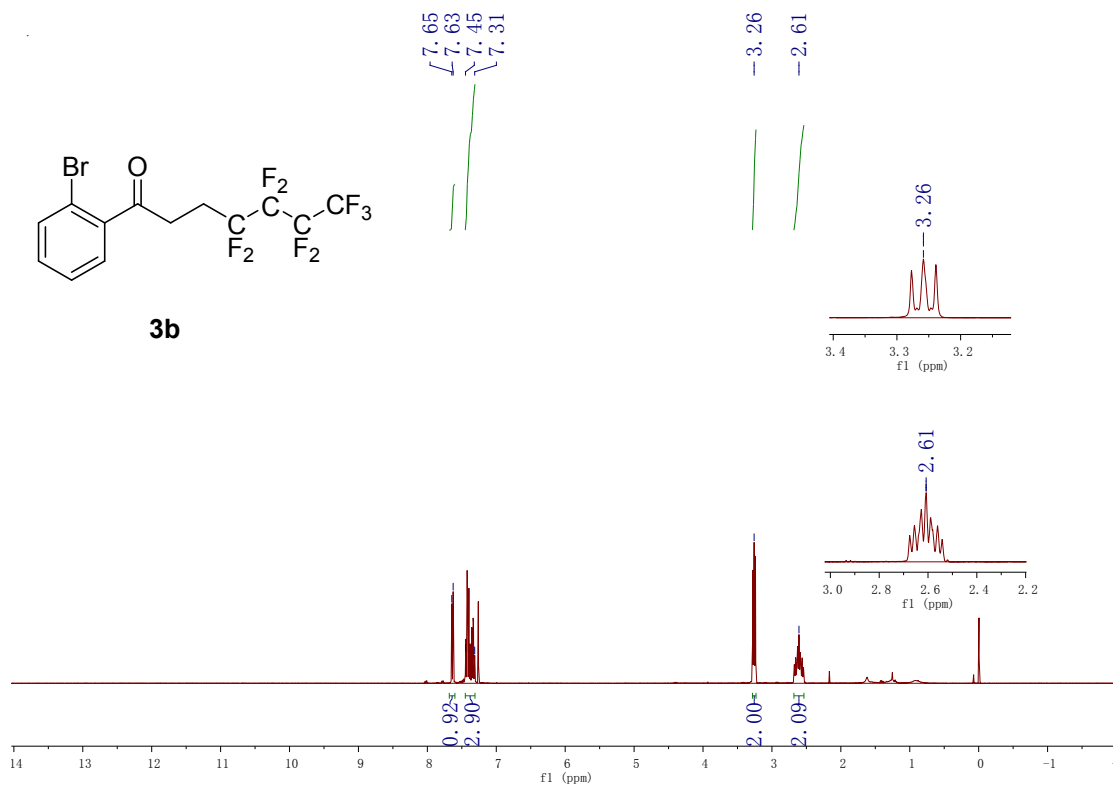

<sup>19</sup>F NMR:

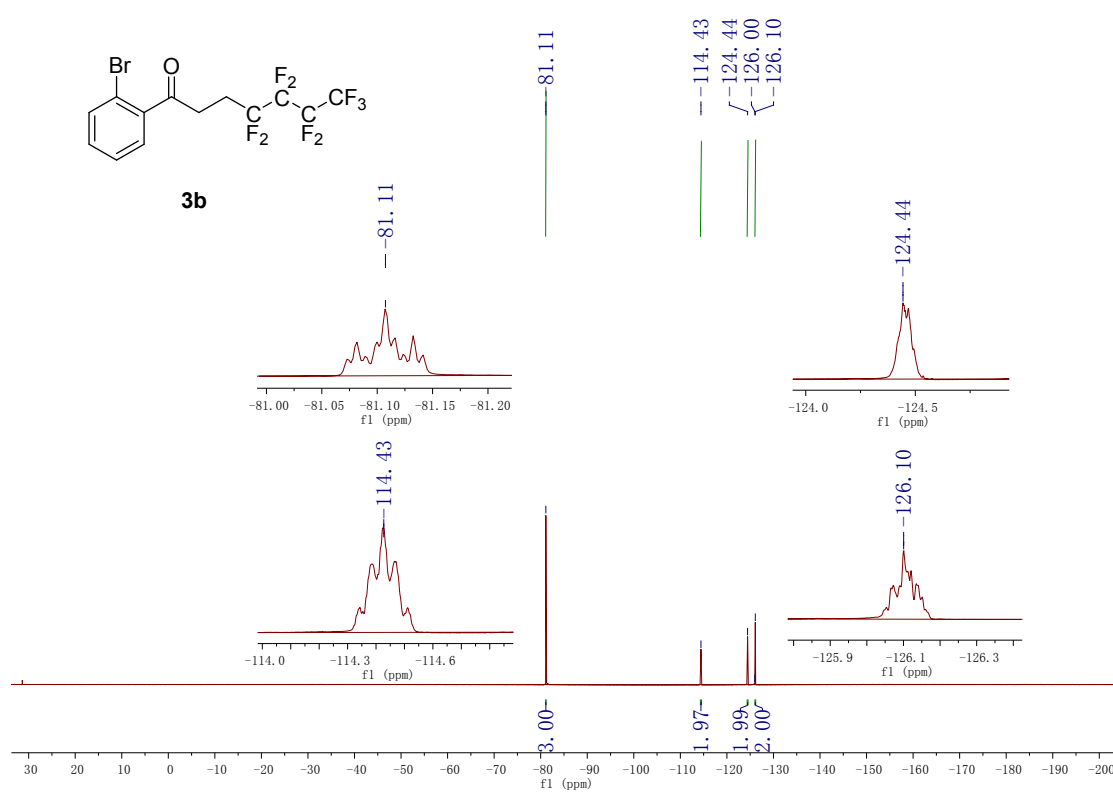

<sup>13</sup>C NMR:

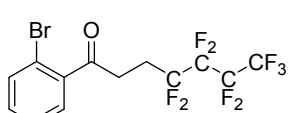

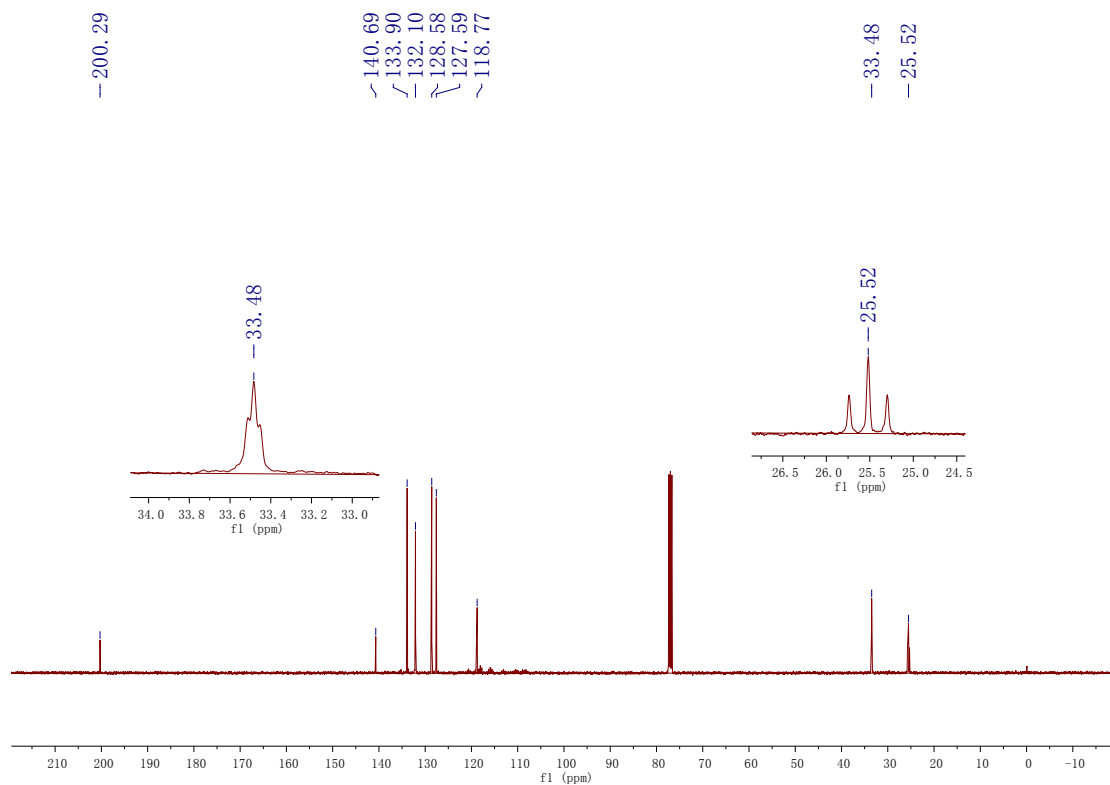

$^1\text{H}$  NMR:

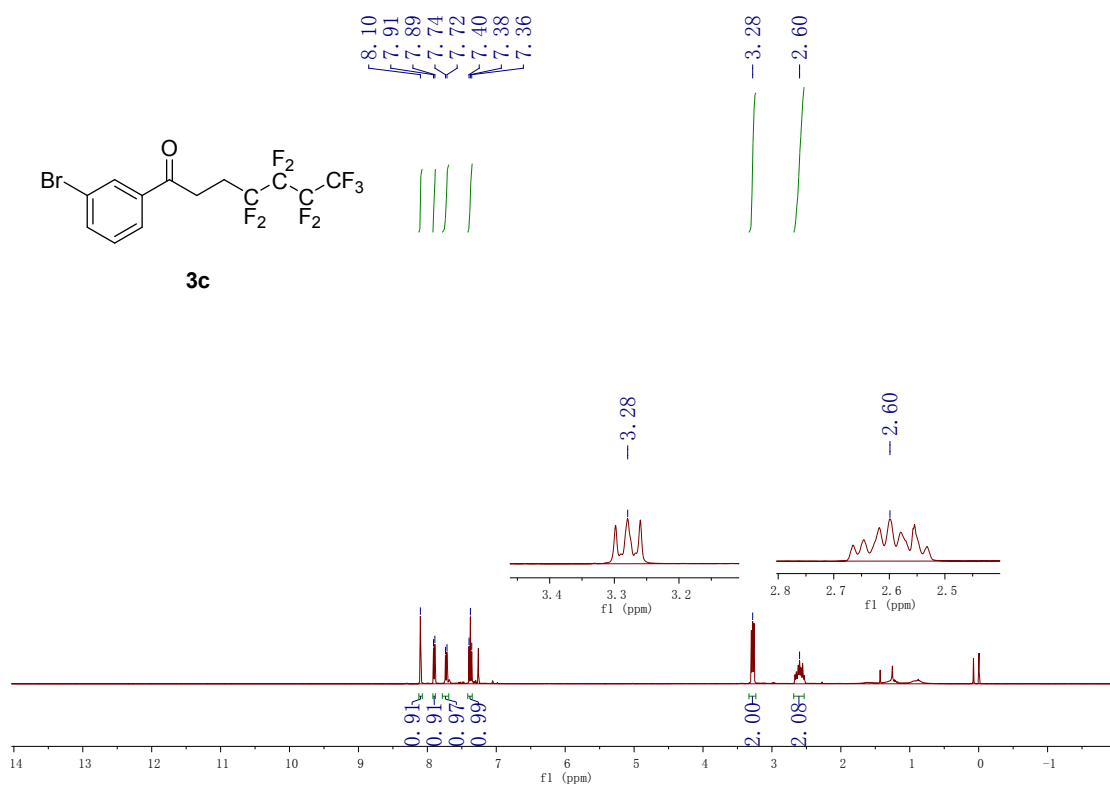

$^{19}\text{F}$  NMR:

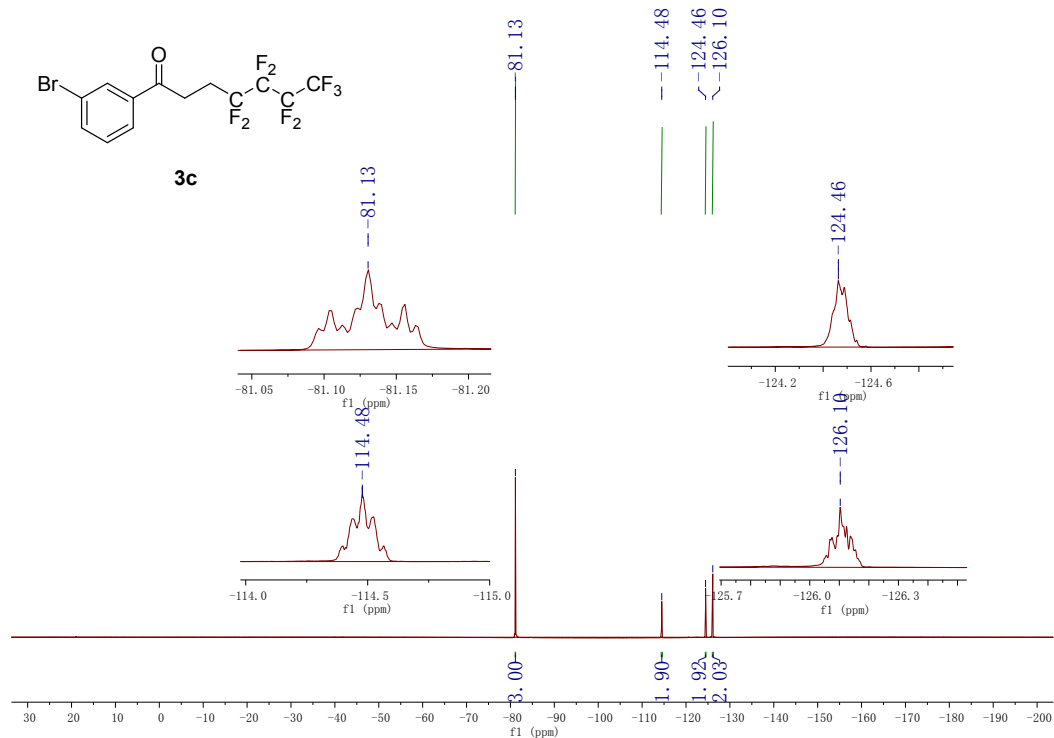

$^{13}\text{C}$  NMR:

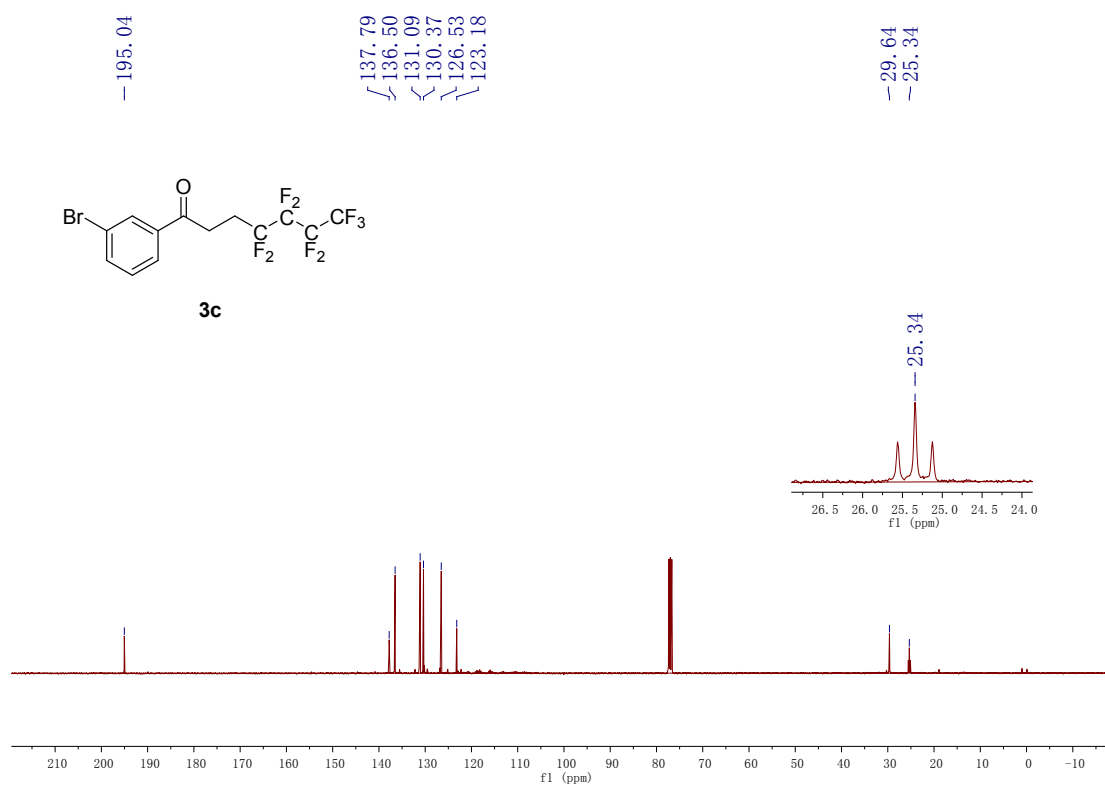

$^1\text{H}$  NMR:

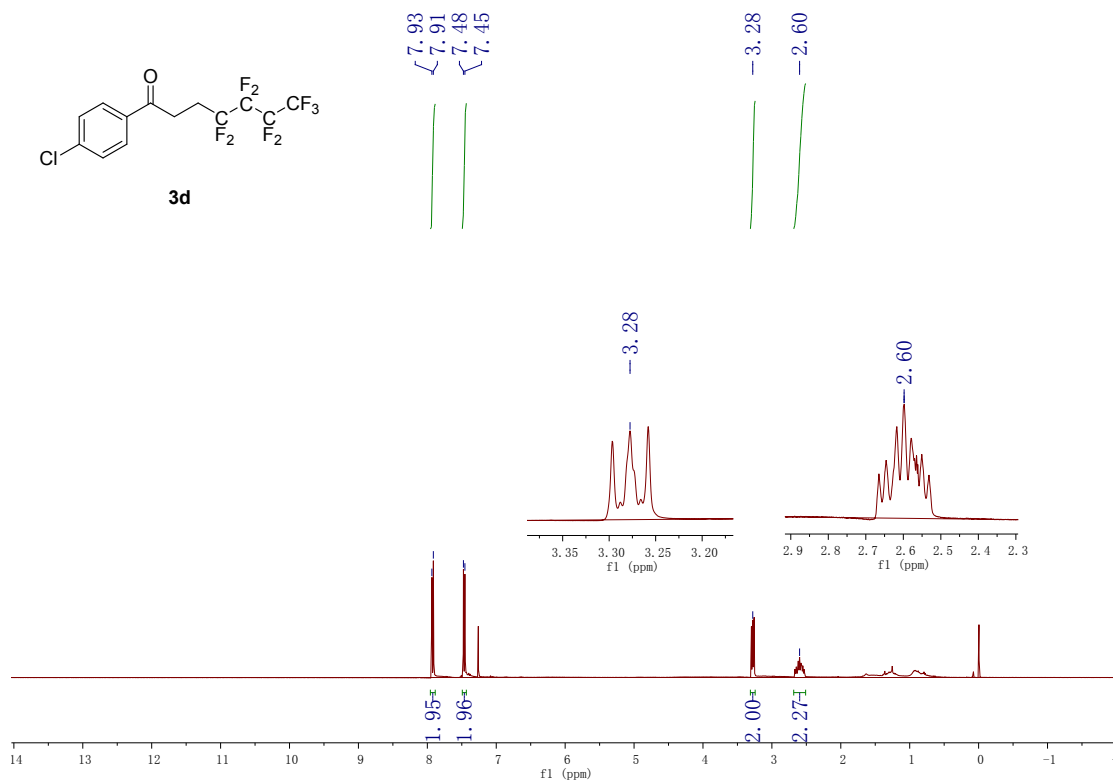

**19F NMR:**

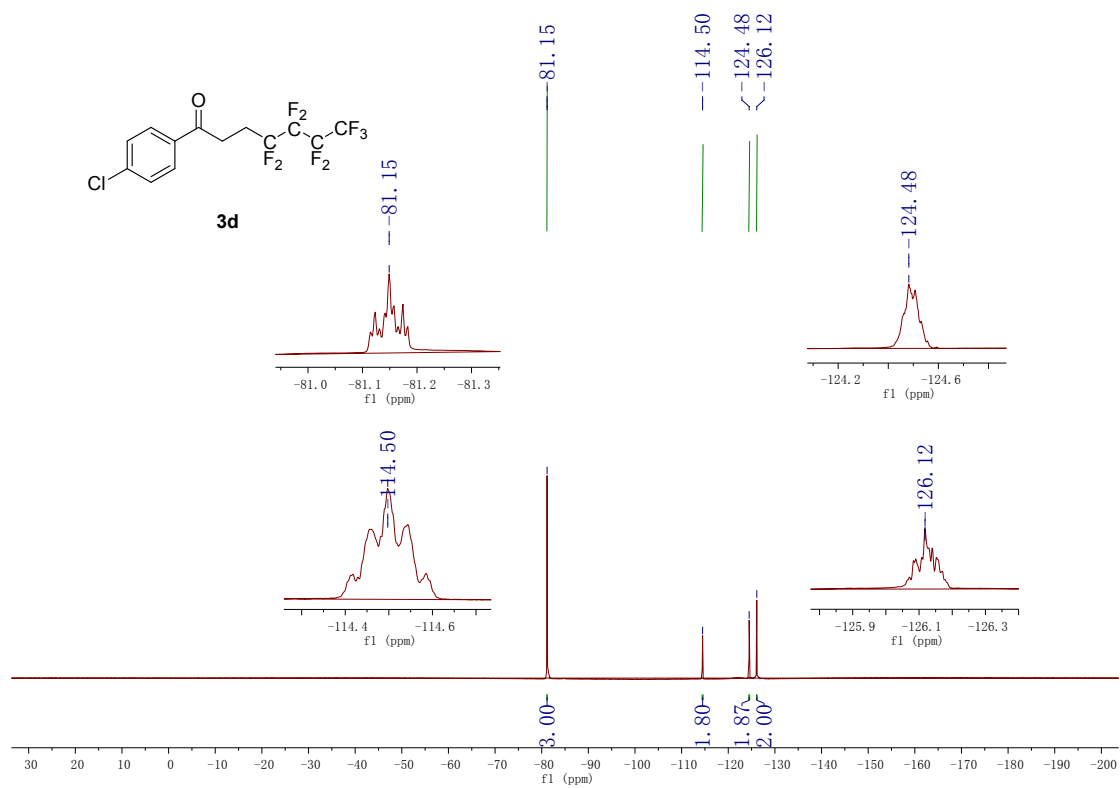

**13C NMR:**

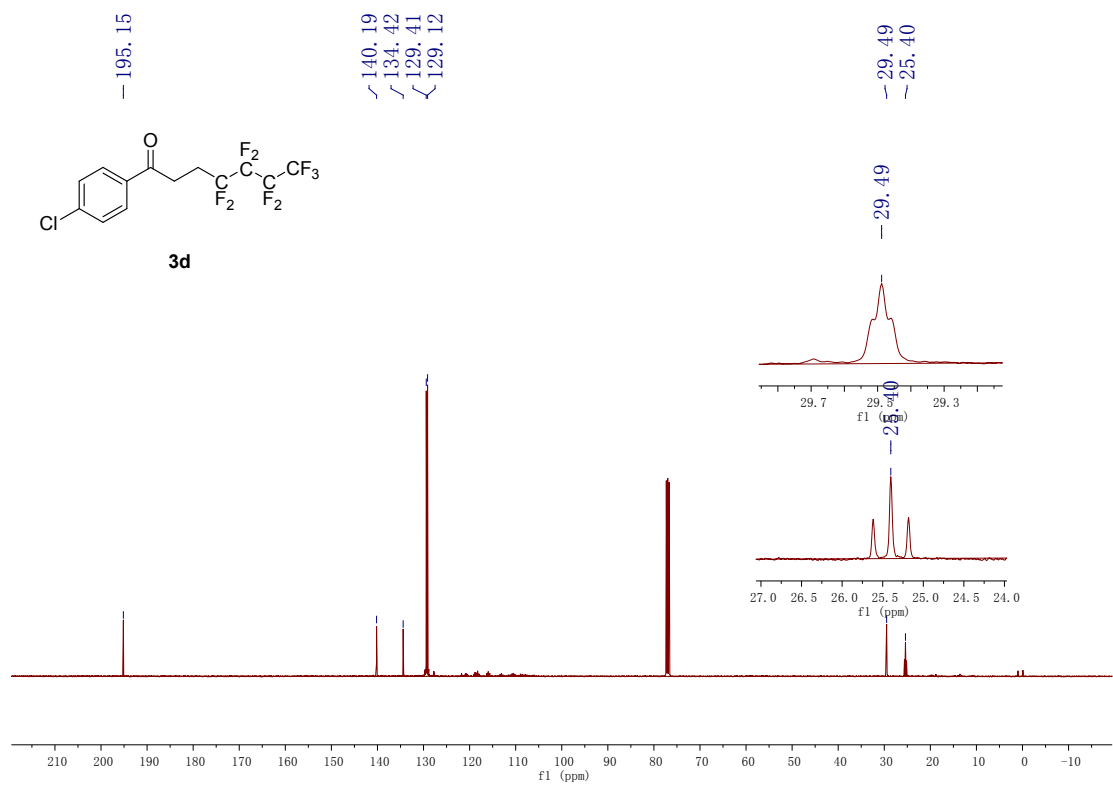

<sup>1</sup>H NMR:

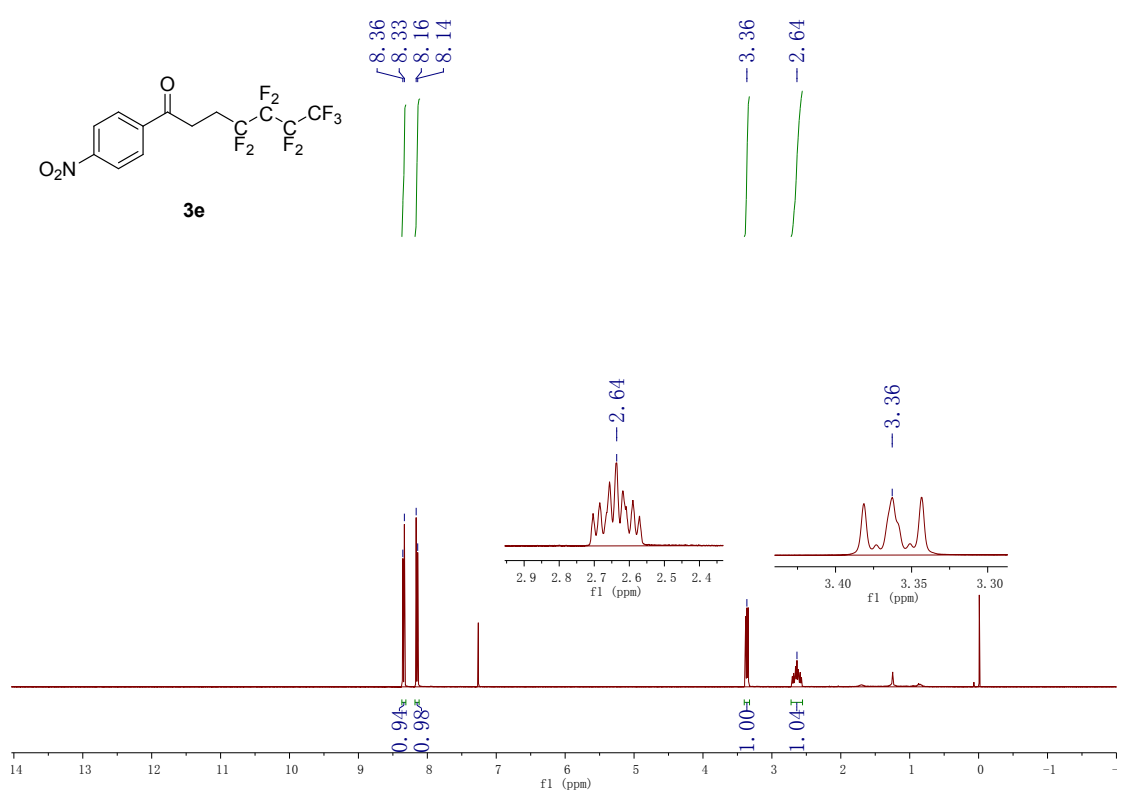

<sup>19</sup>F NMR:

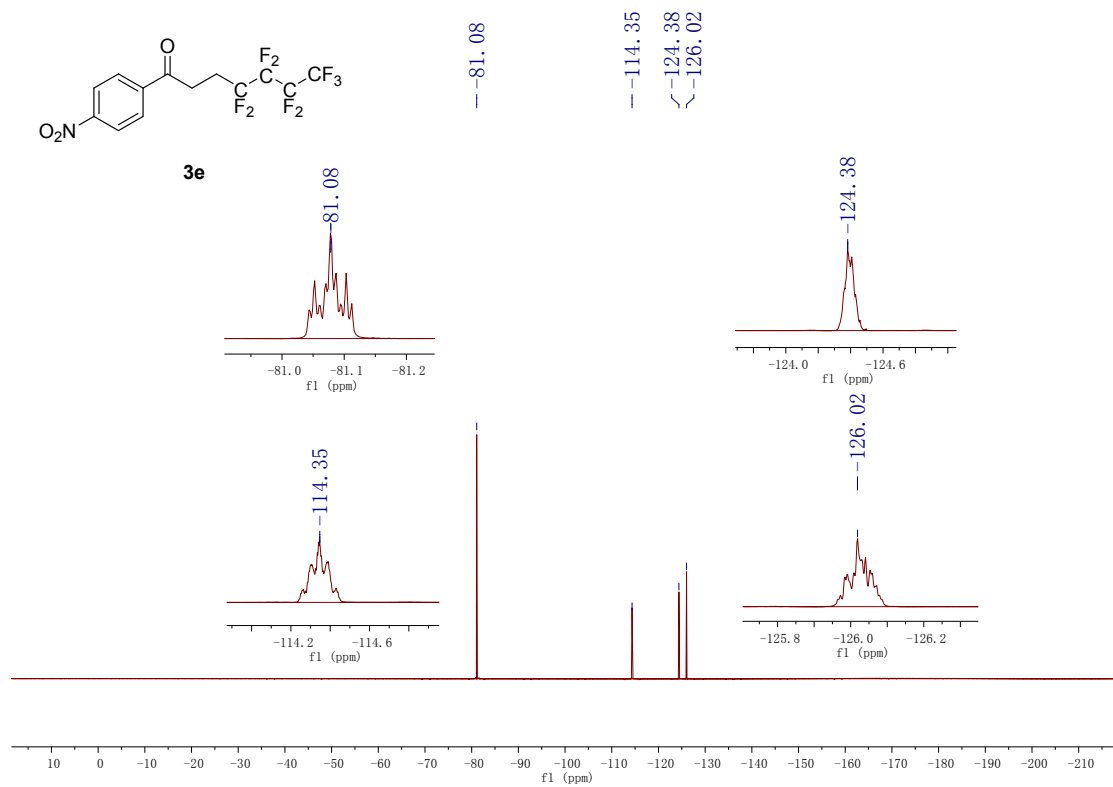

$^{13}\text{C}$  NMR:

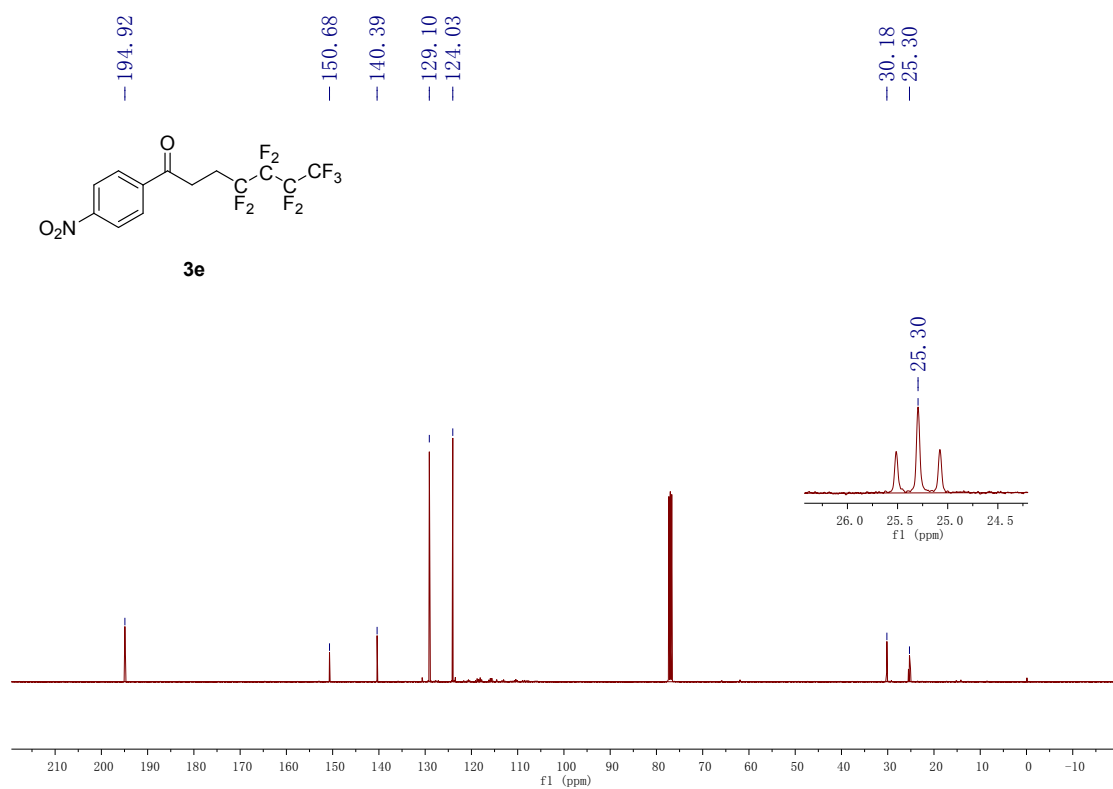

$^1\text{H}$  NMR:



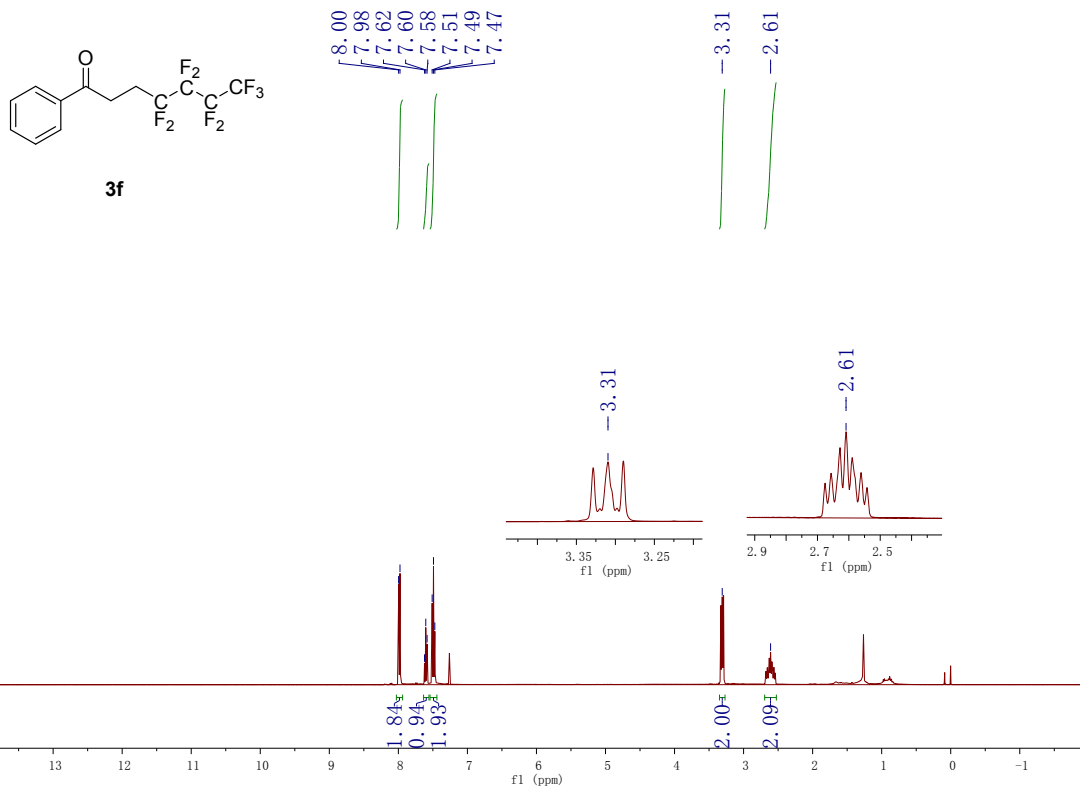

<sup>19</sup>F NMR:

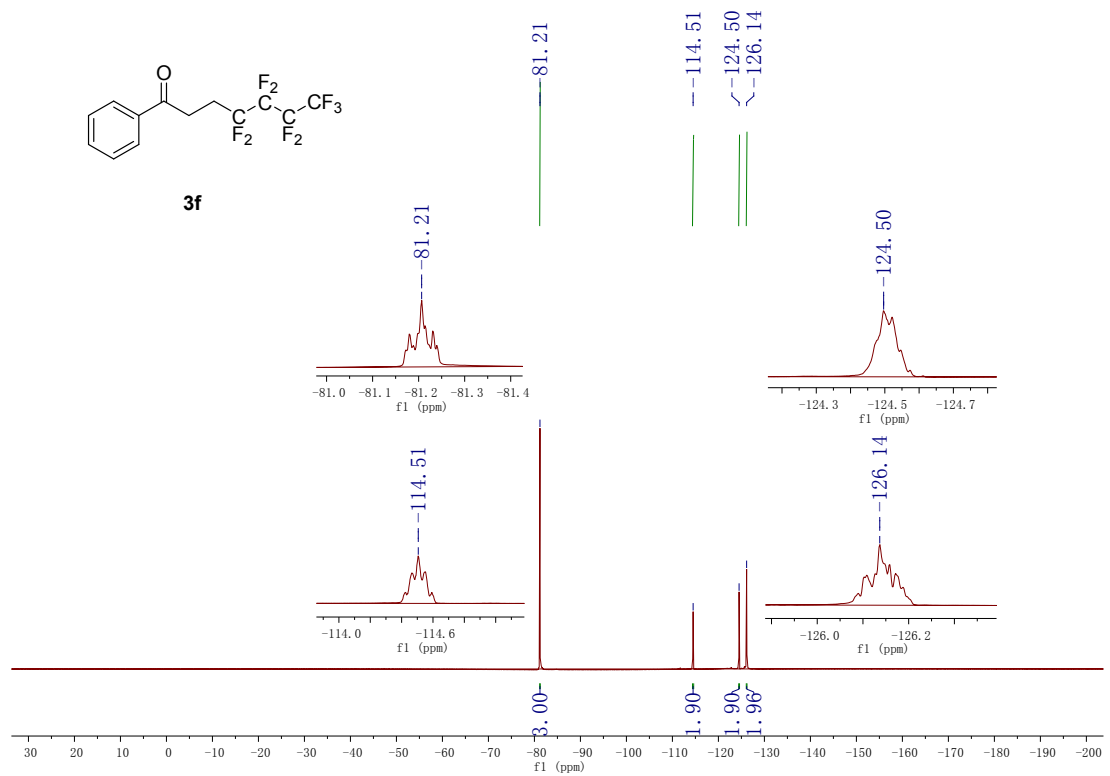

<sup>13</sup>C NMR:

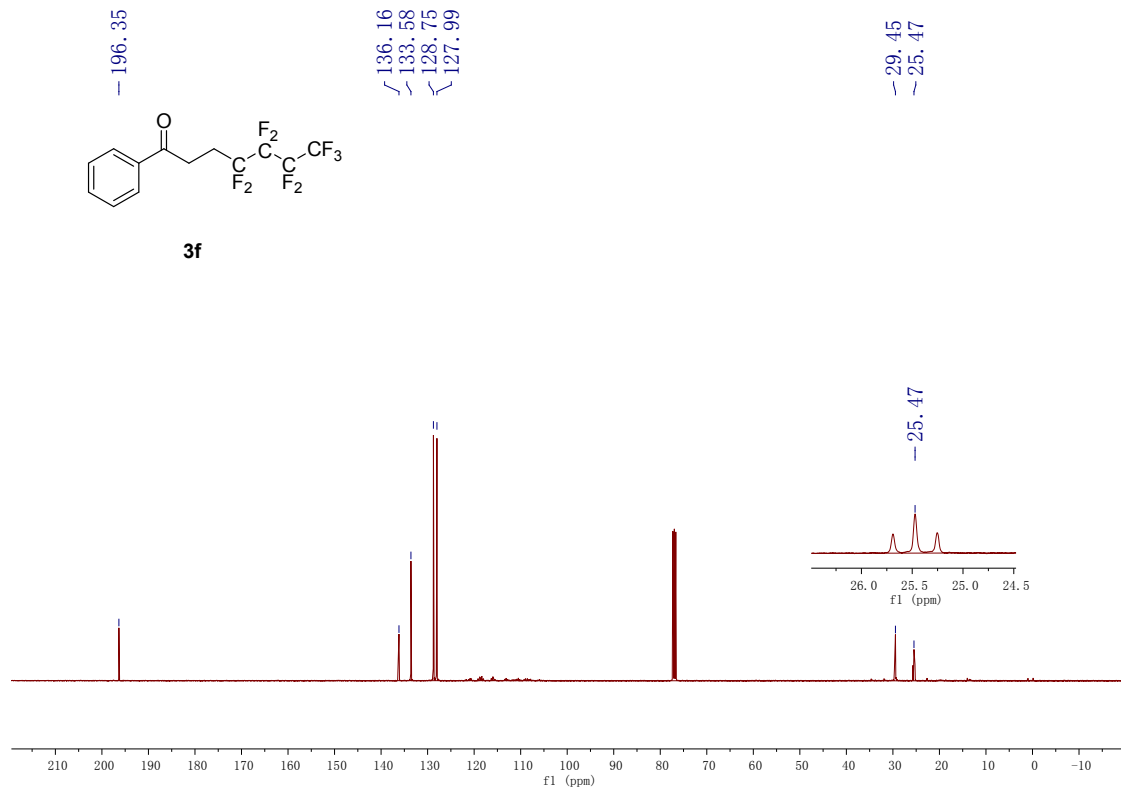

<sup>1</sup>H NMR:

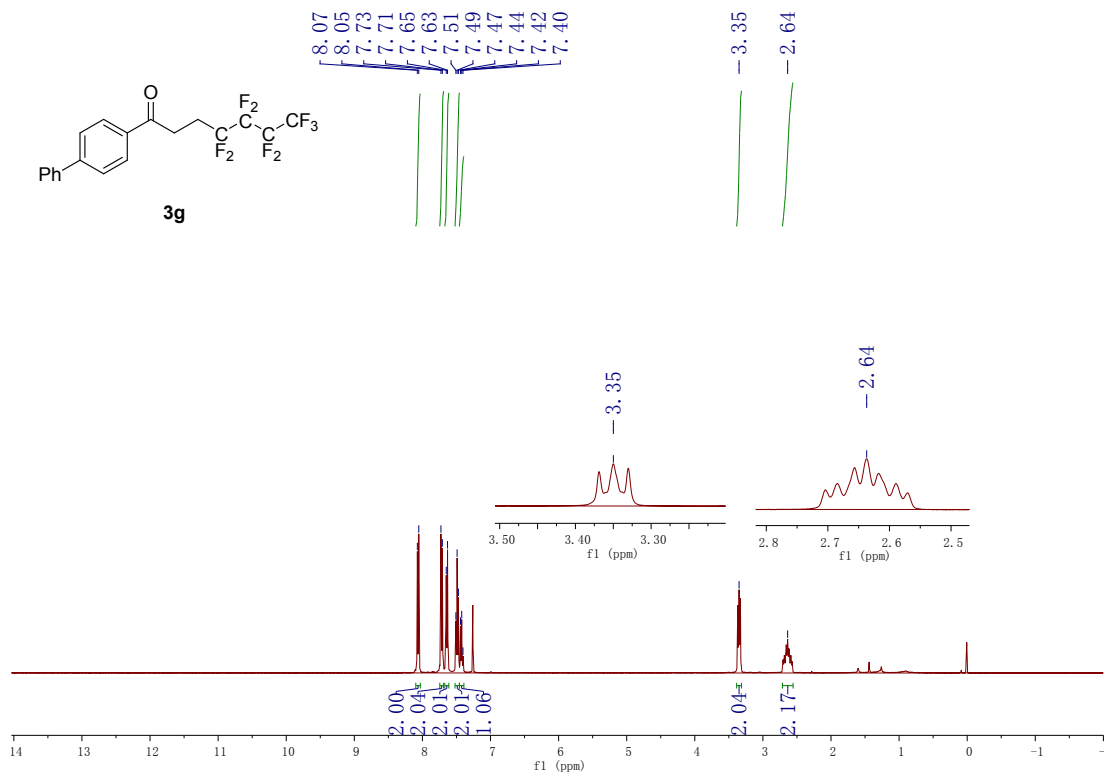

<sup>19</sup>F NMR:

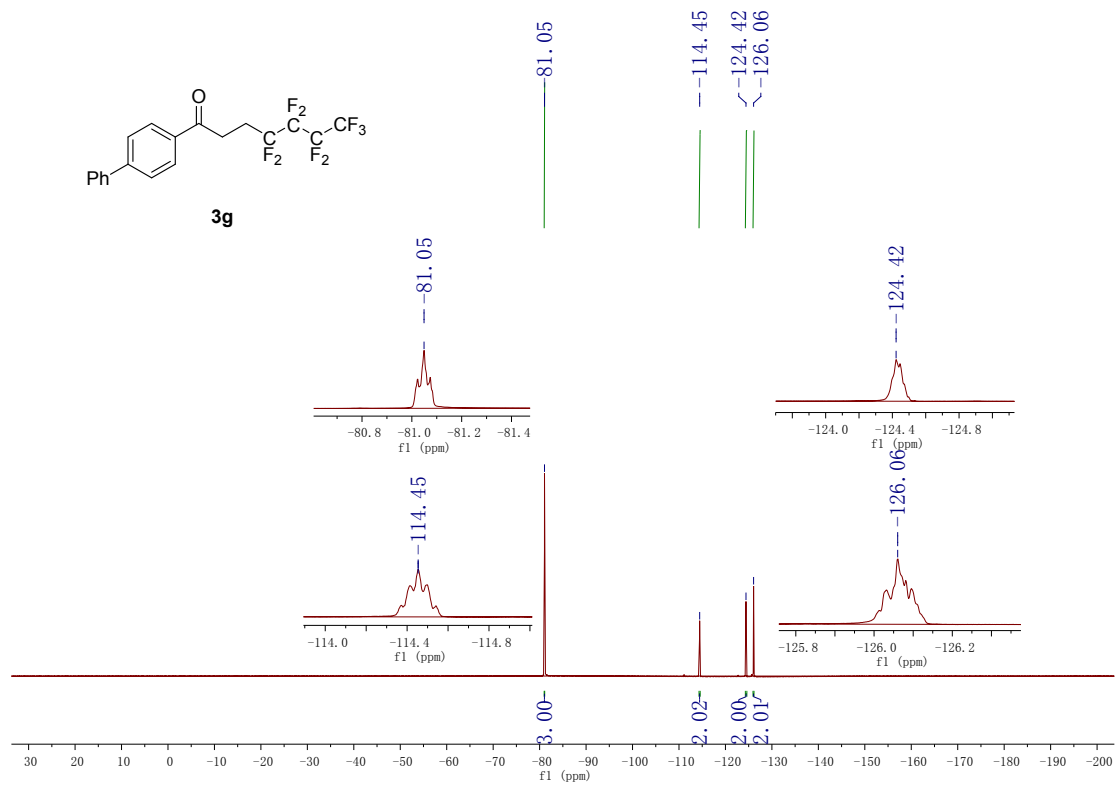

<sup>13</sup>C NMR:

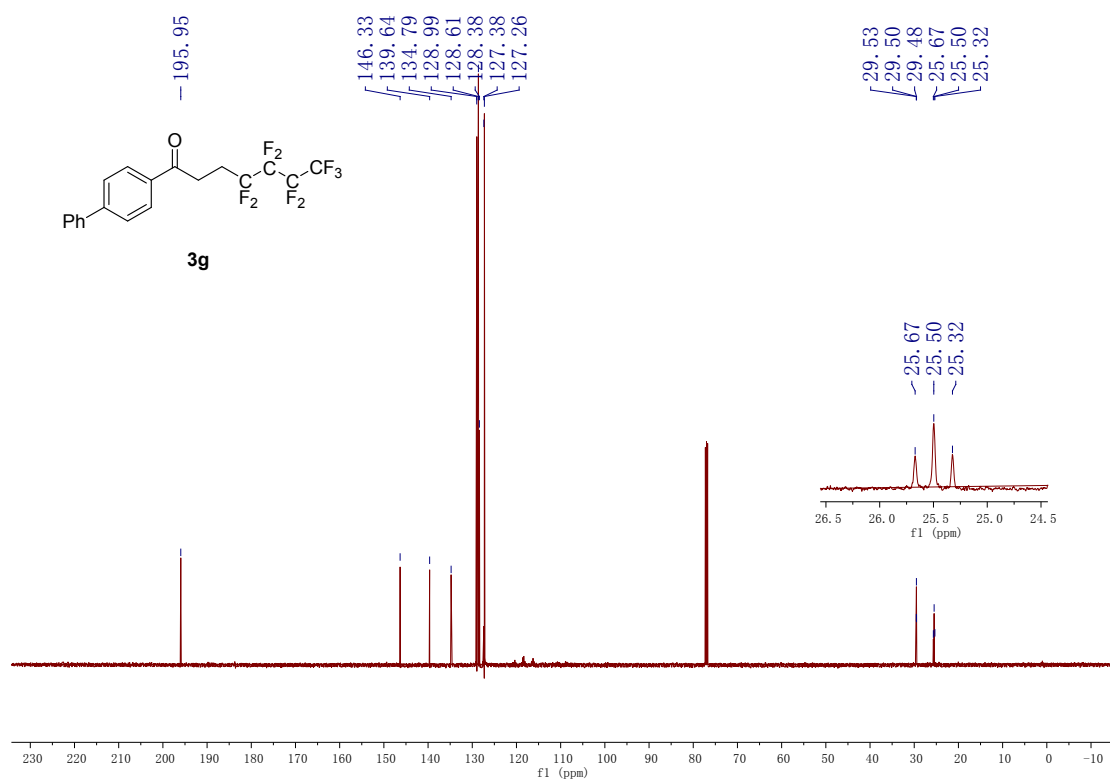

<sup>1</sup>H NMR:

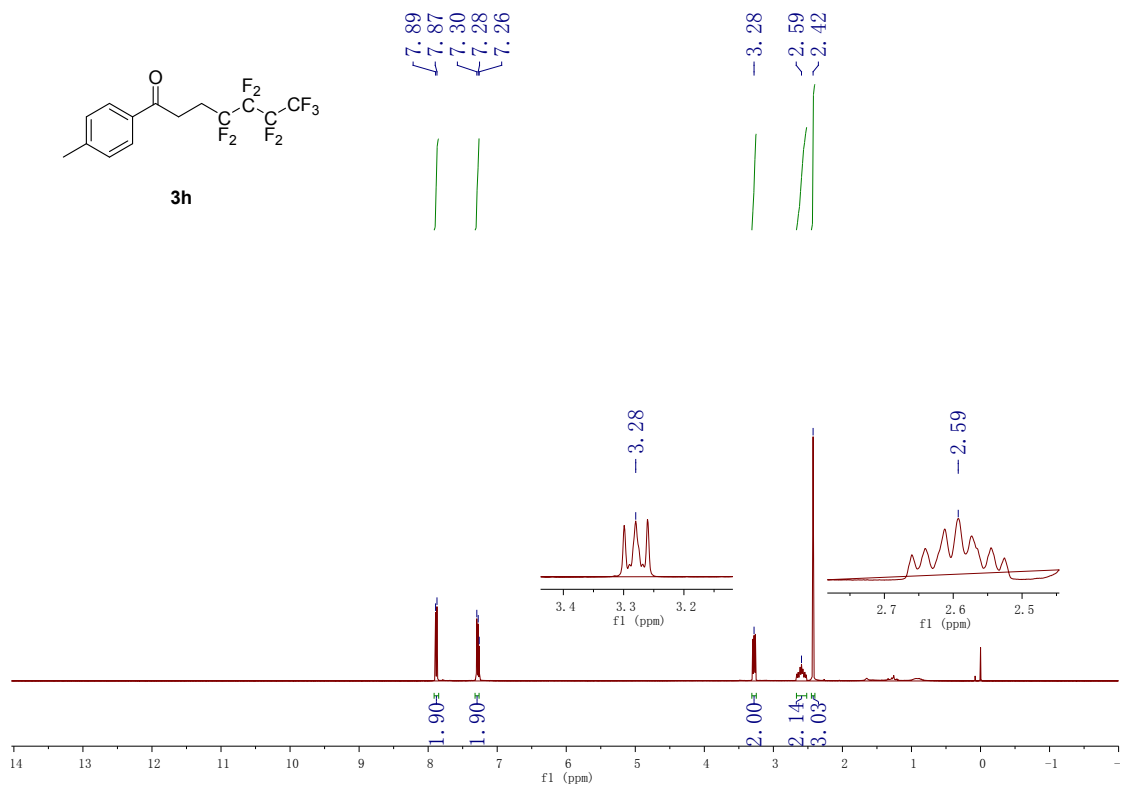

<sup>19</sup>F NMR:

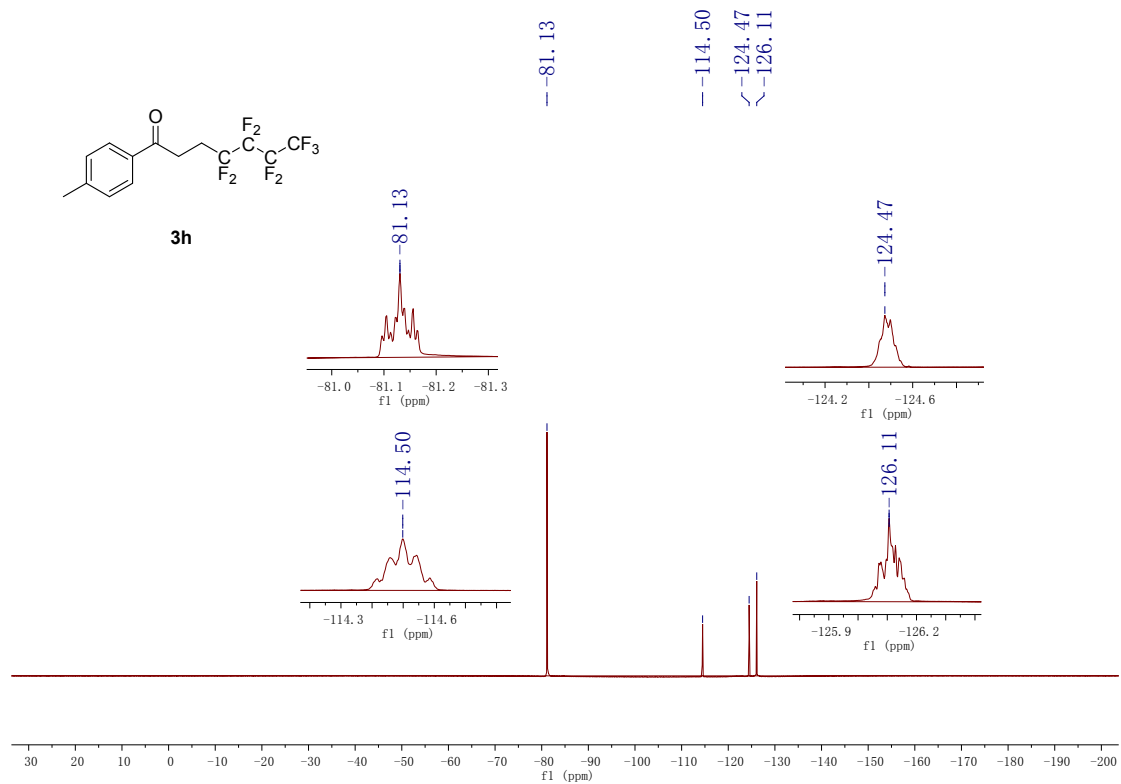

<sup>13</sup>C NMR:

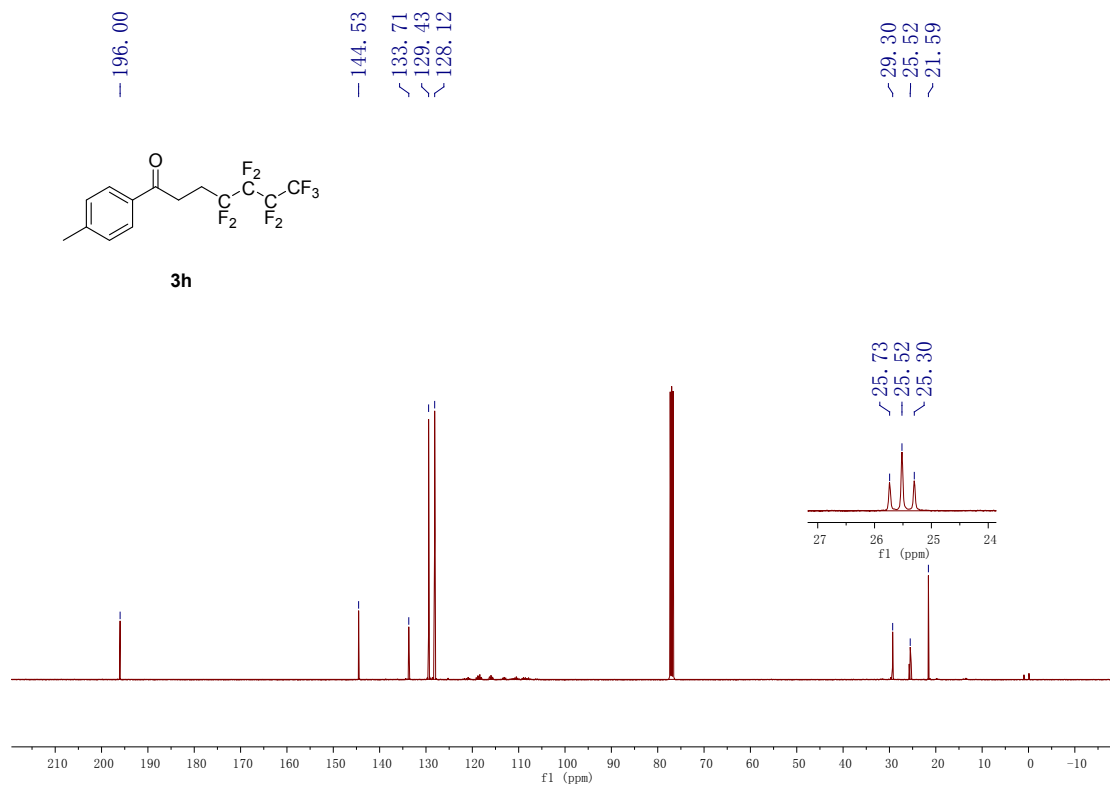

<sup>1</sup>H NMR:

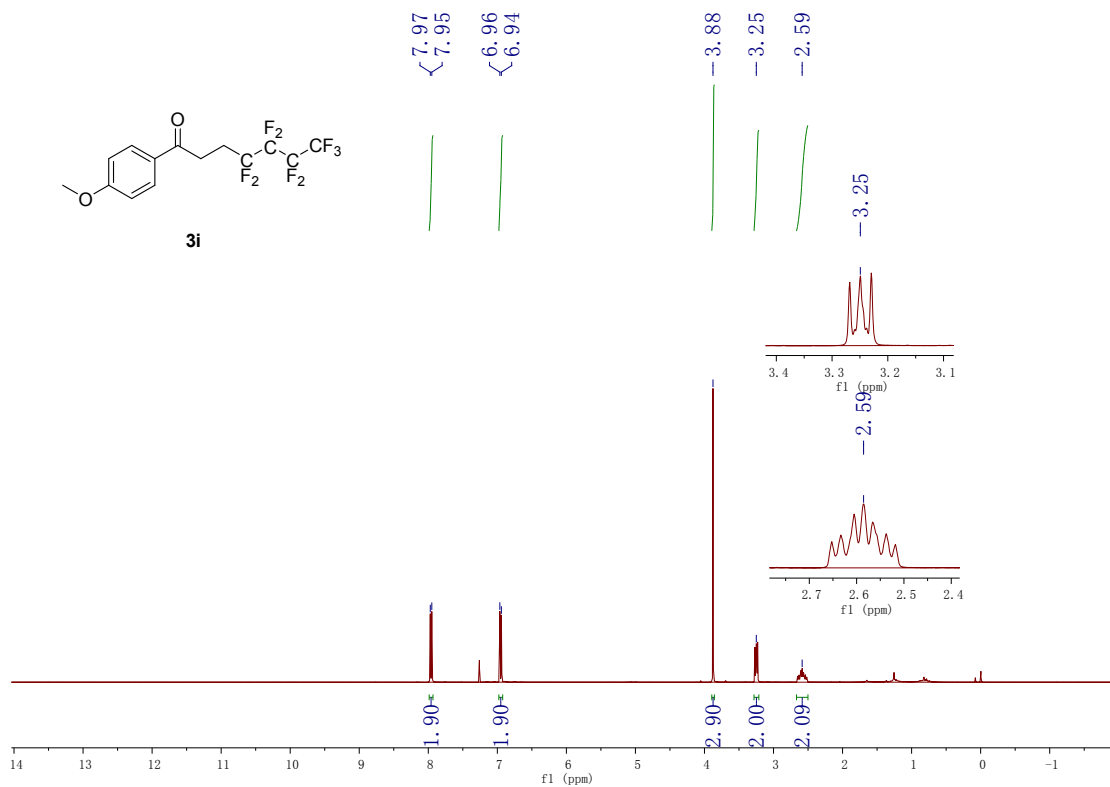

<sup>19</sup>F NMR:

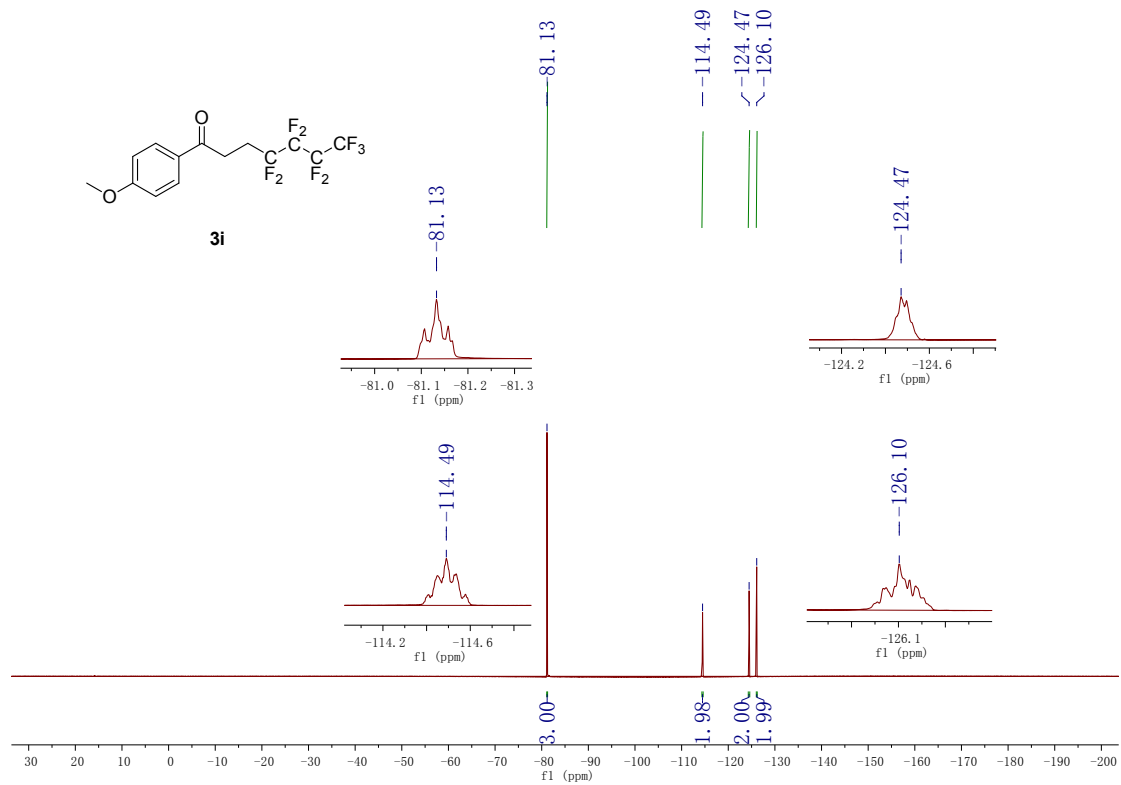

<sup>13</sup>C NMR:

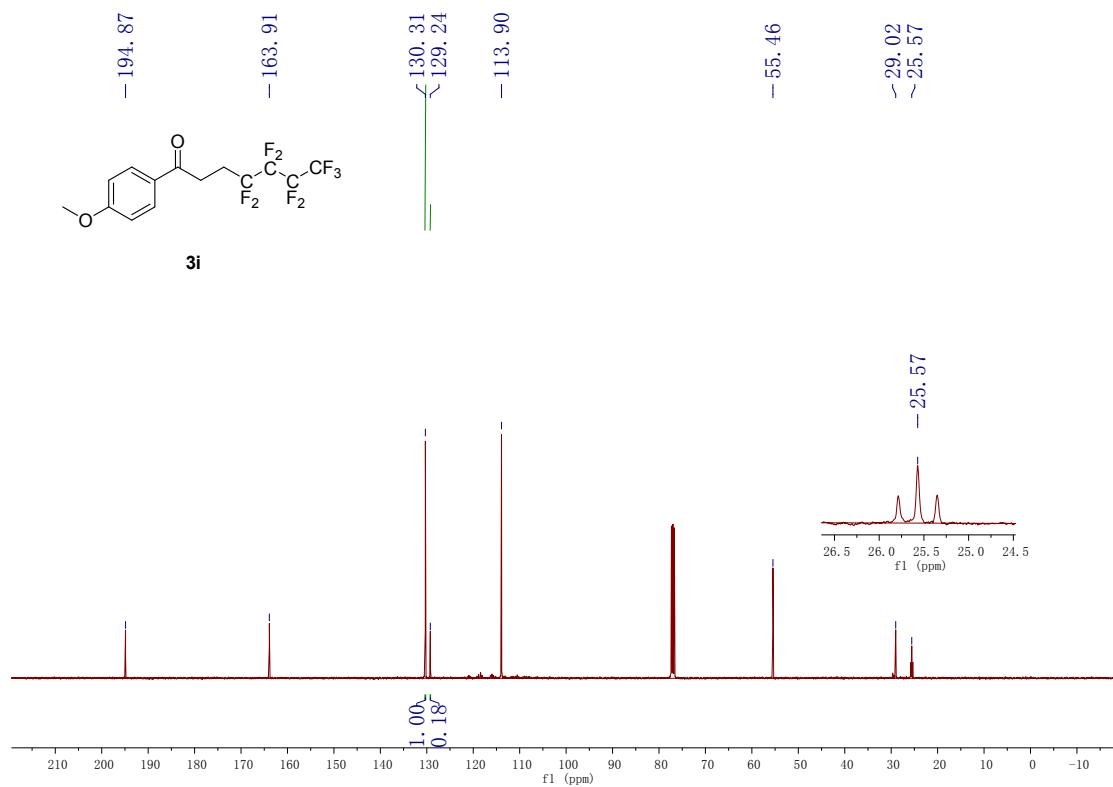

<sup>1</sup>H NMR:

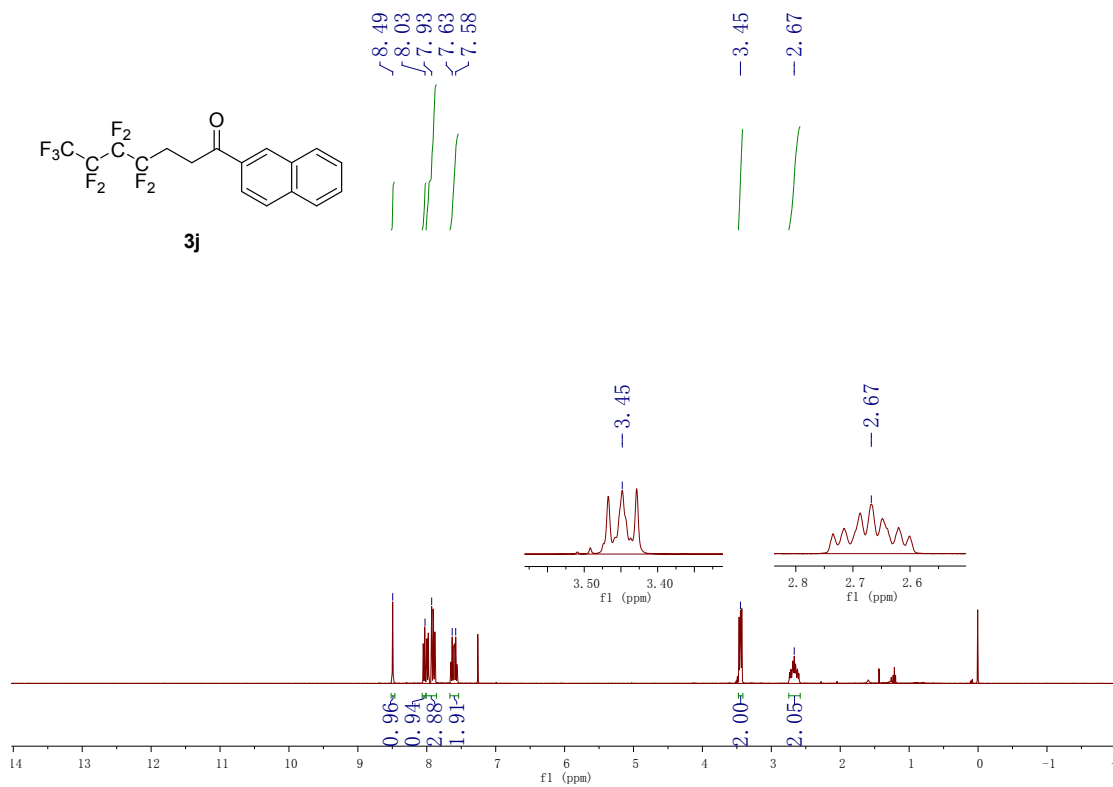

<sup>19</sup>F NMR:

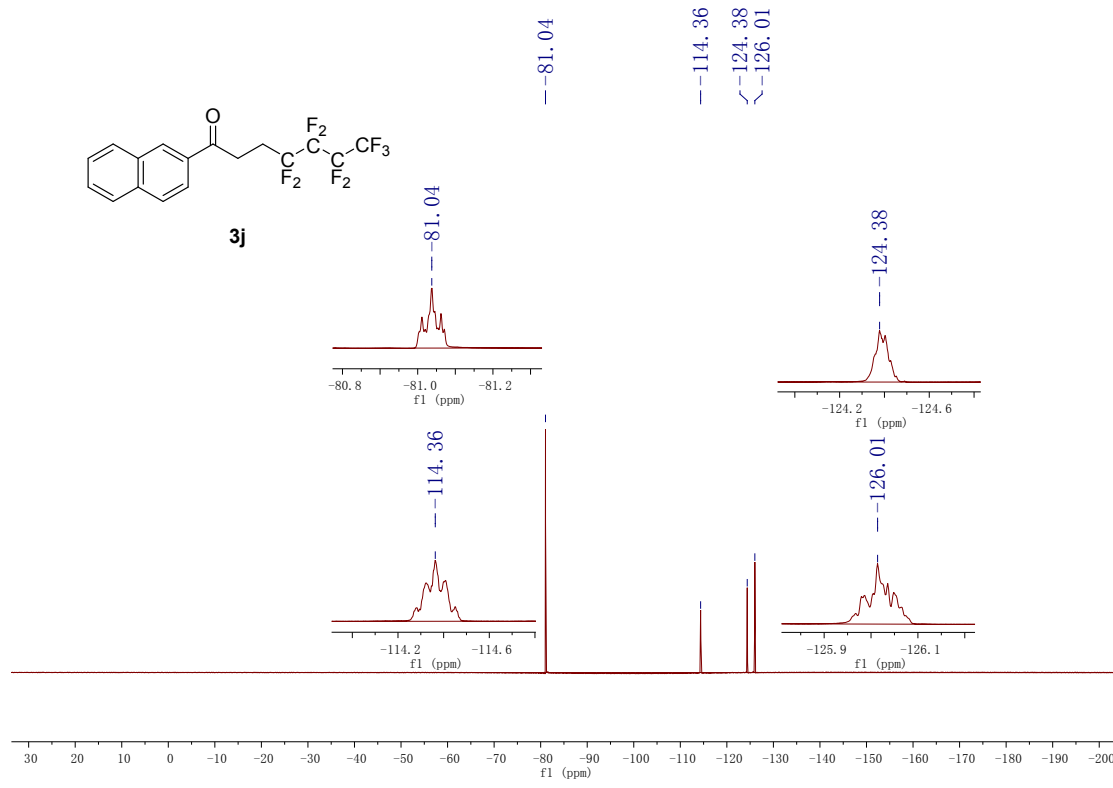

<sup>13</sup>C NMR:

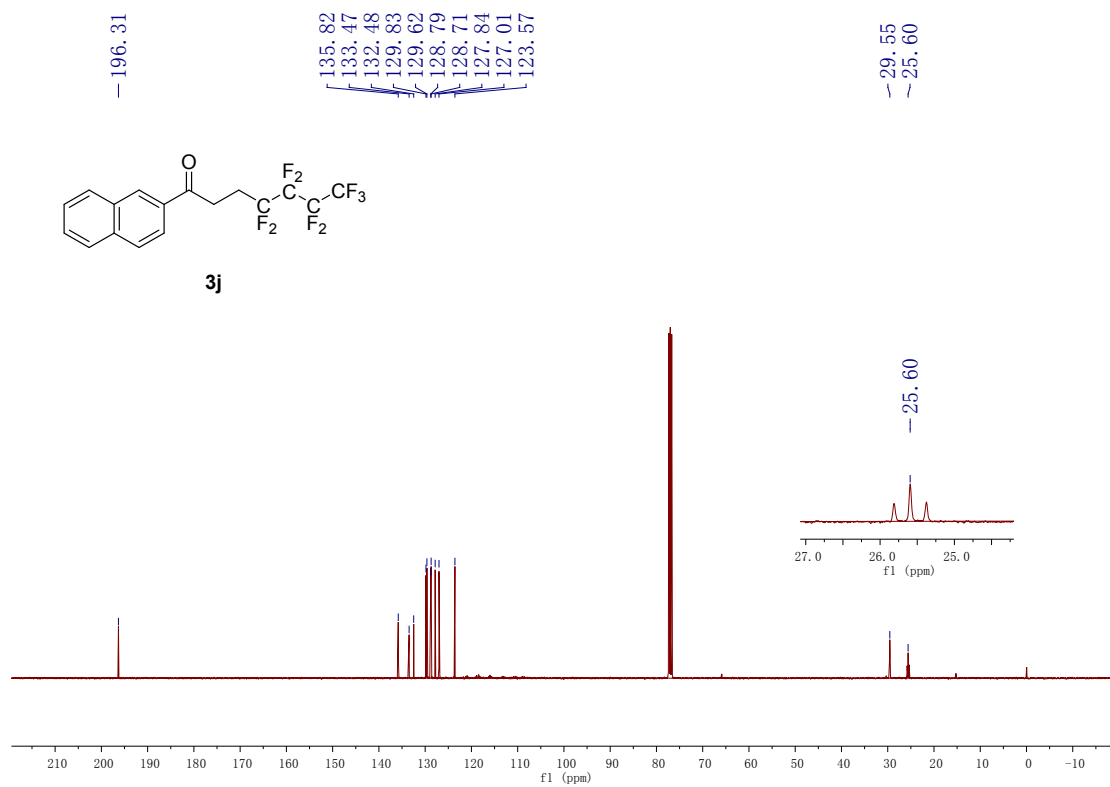

$^1\text{H}$  NMR:

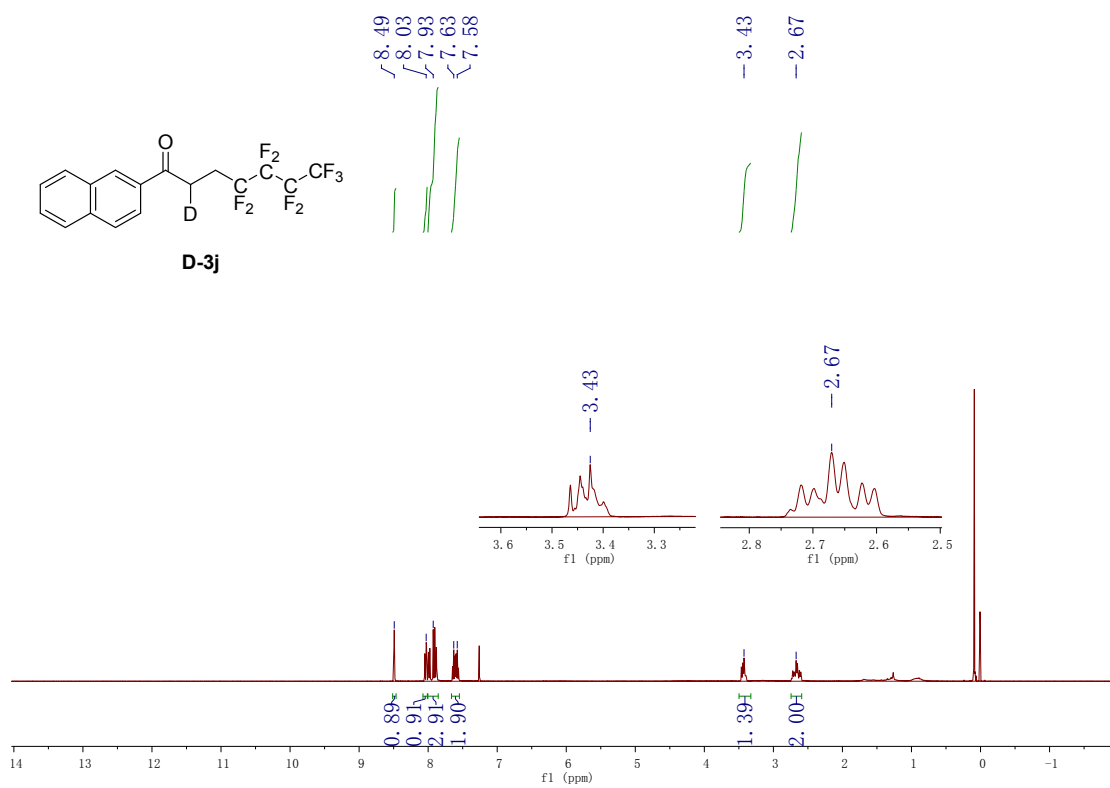

$^2\text{H}$  NMR:



-3.61

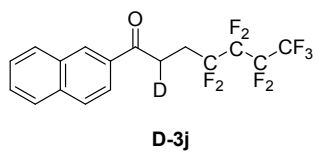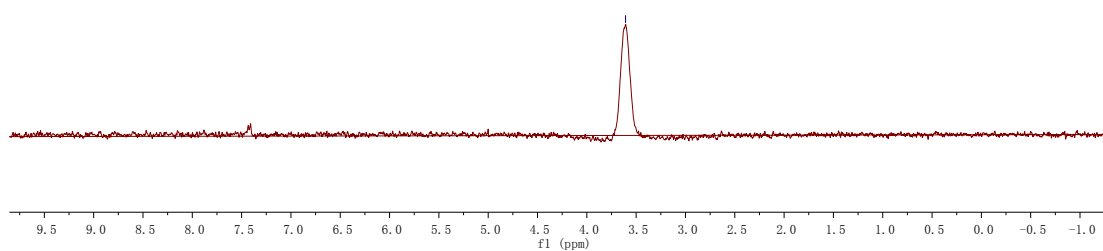

<sup>19</sup>F NMR:

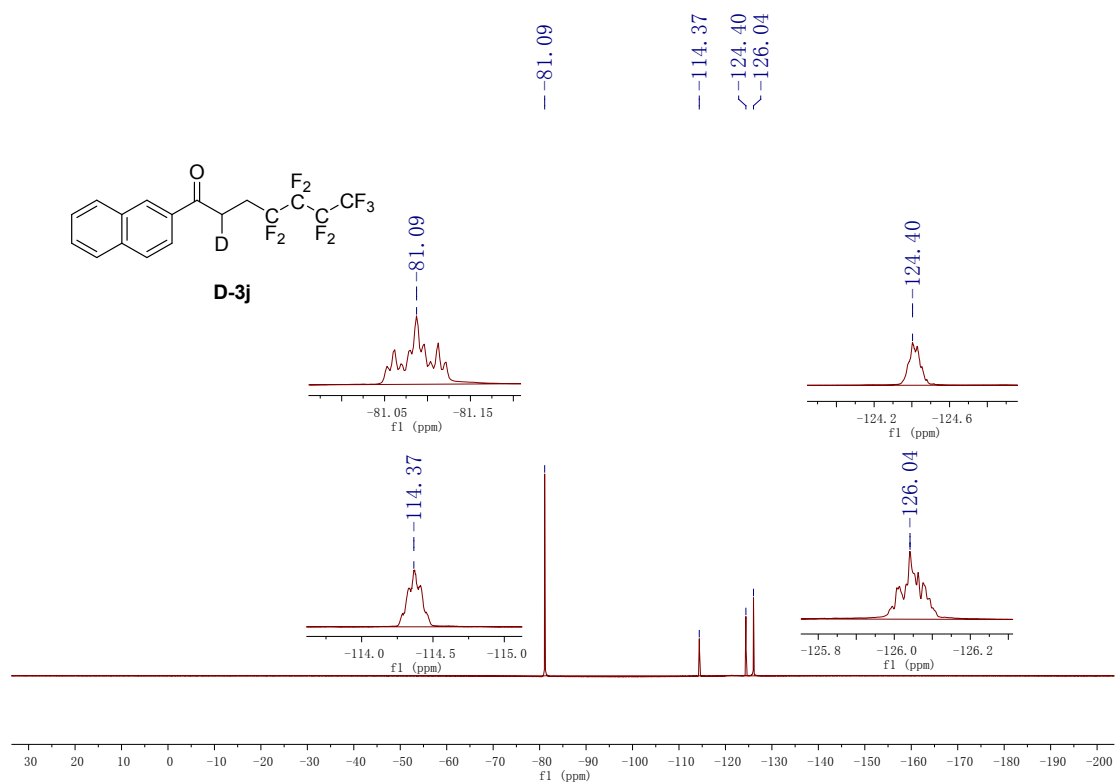

<sup>1</sup>H NMR:

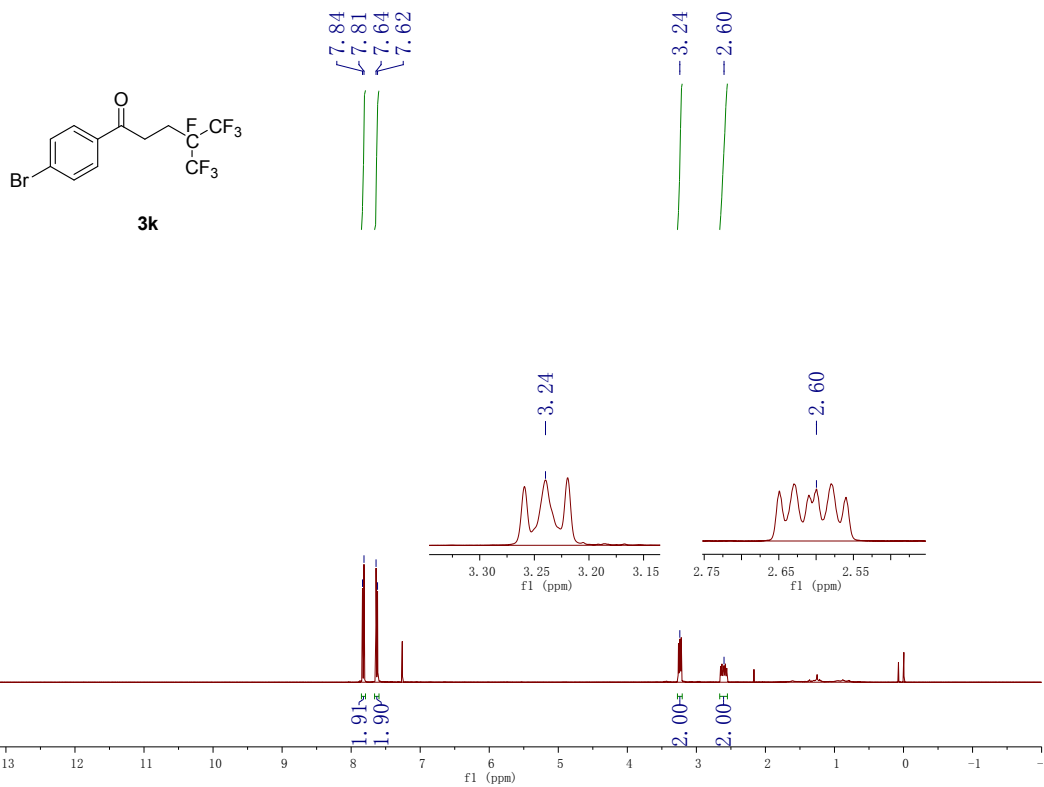

<sup>19</sup>F NMR:

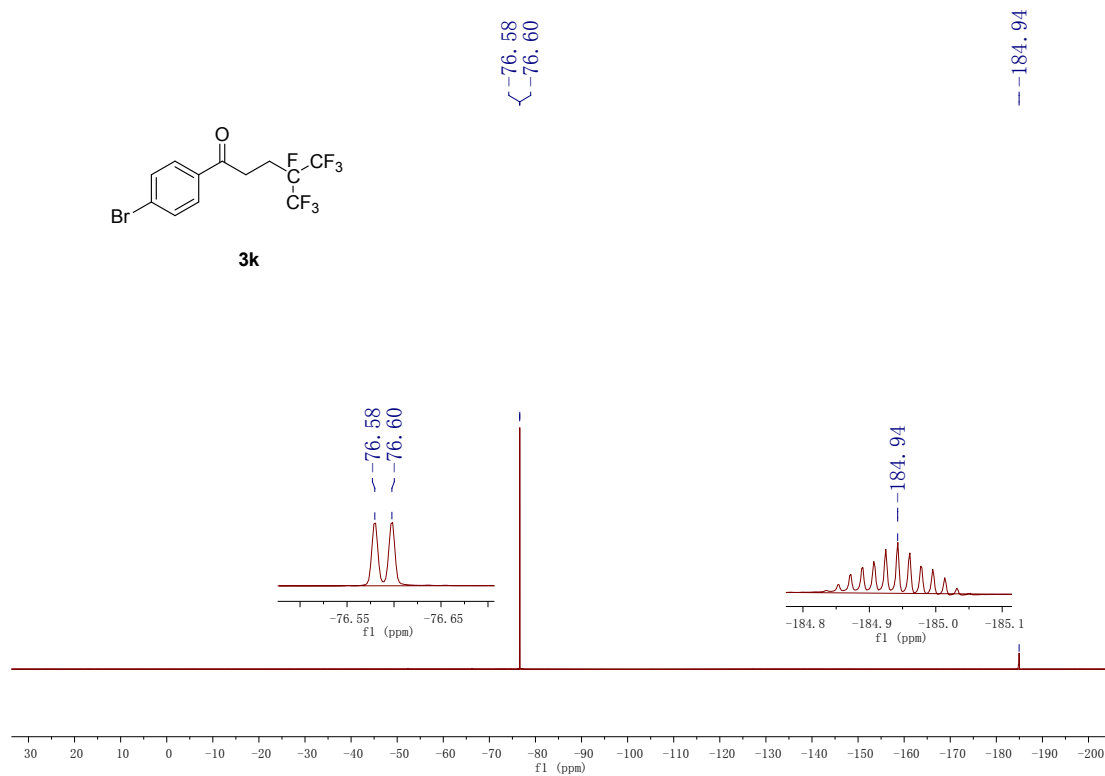

<sup>13</sup>C NMR:

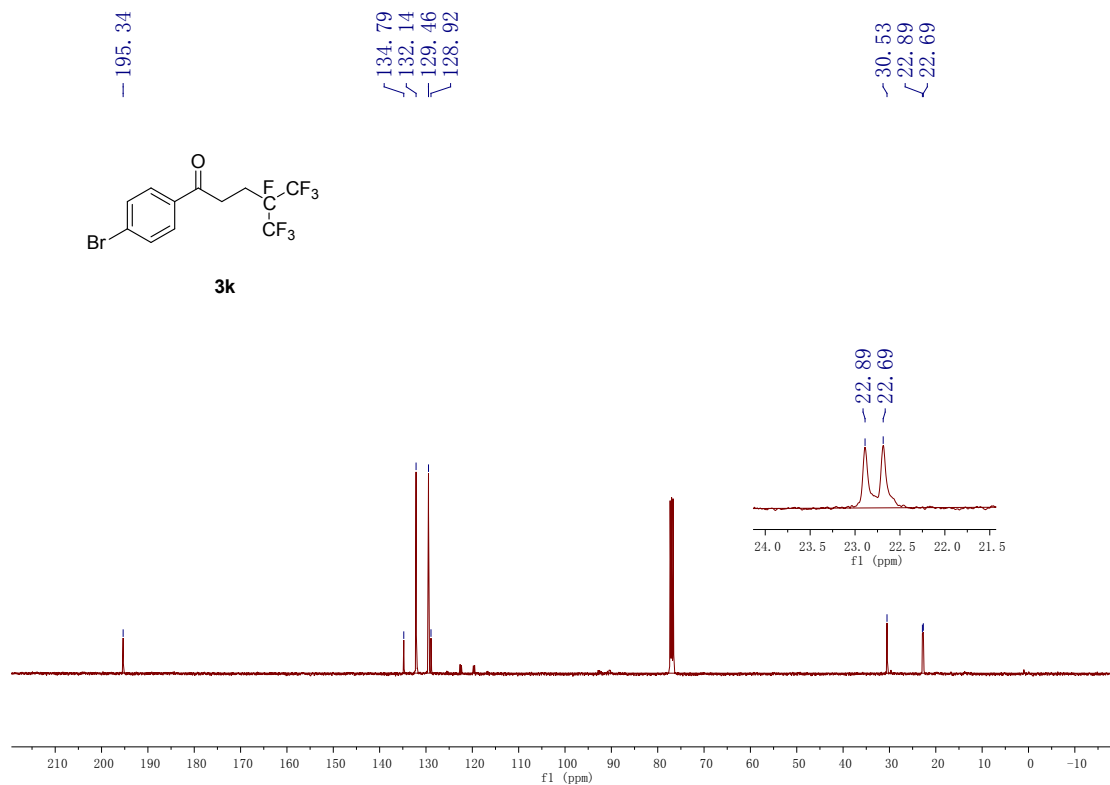

<sup>1</sup>H NMR:

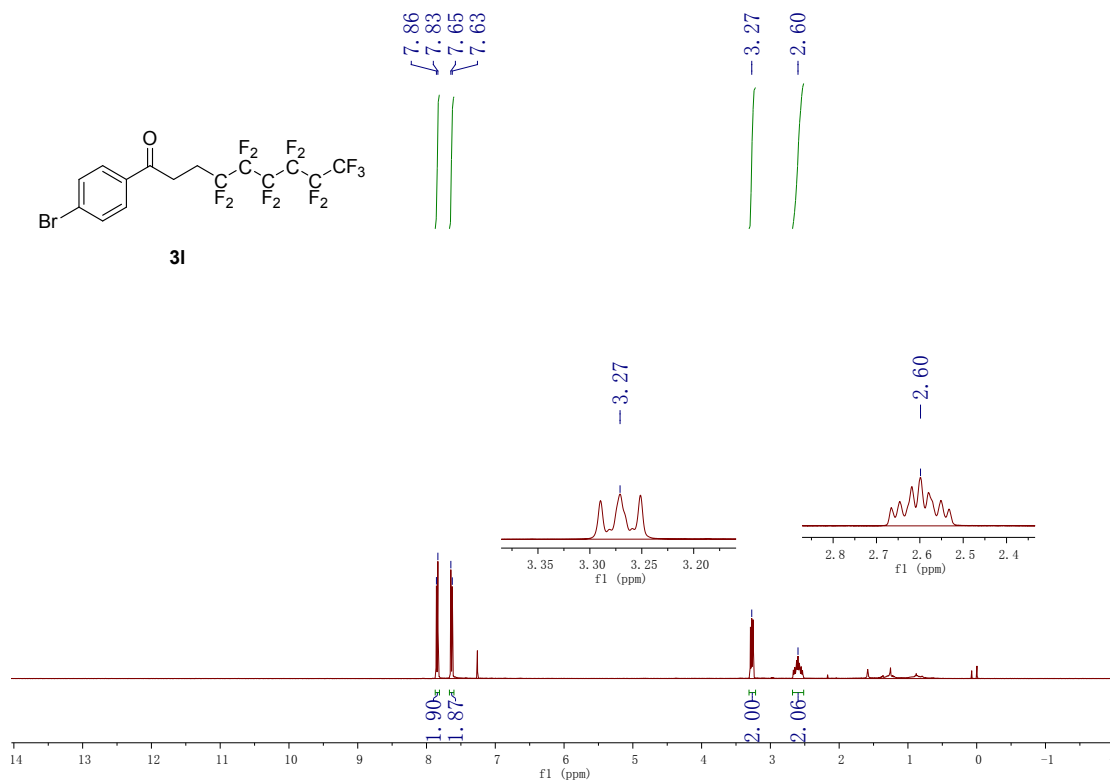

<sup>19</sup>F NMR:

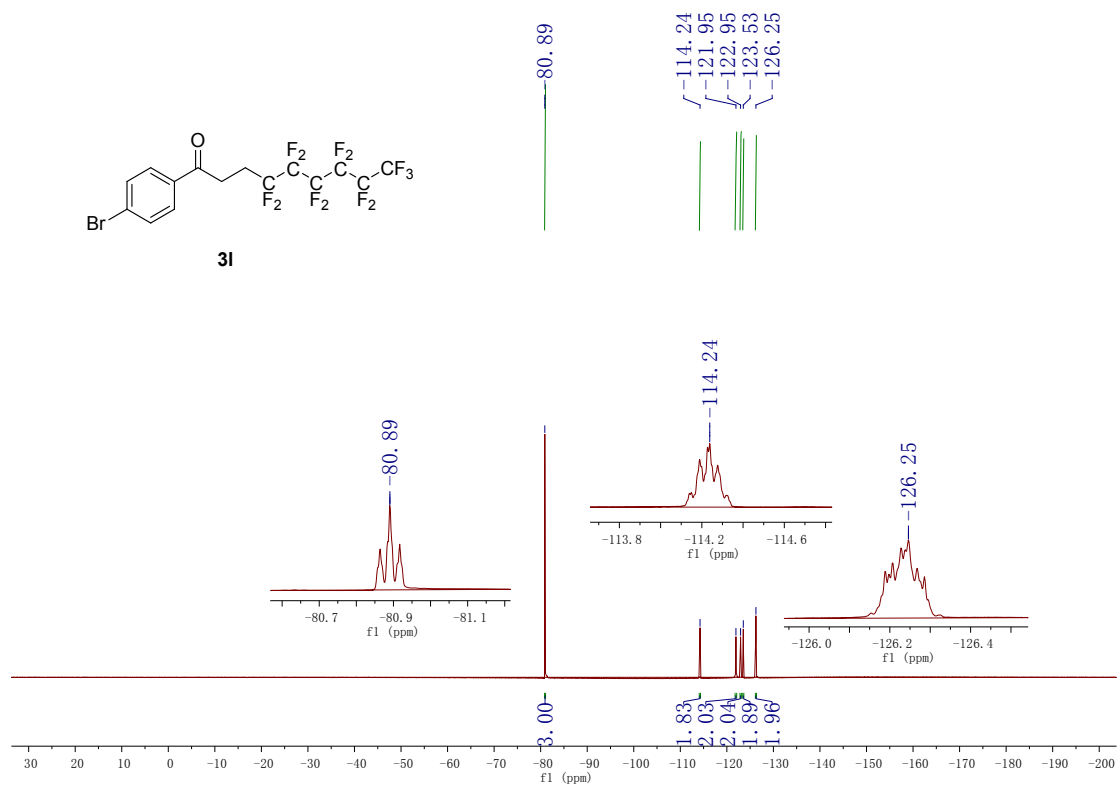

$^{13}\text{C}$  NMR:

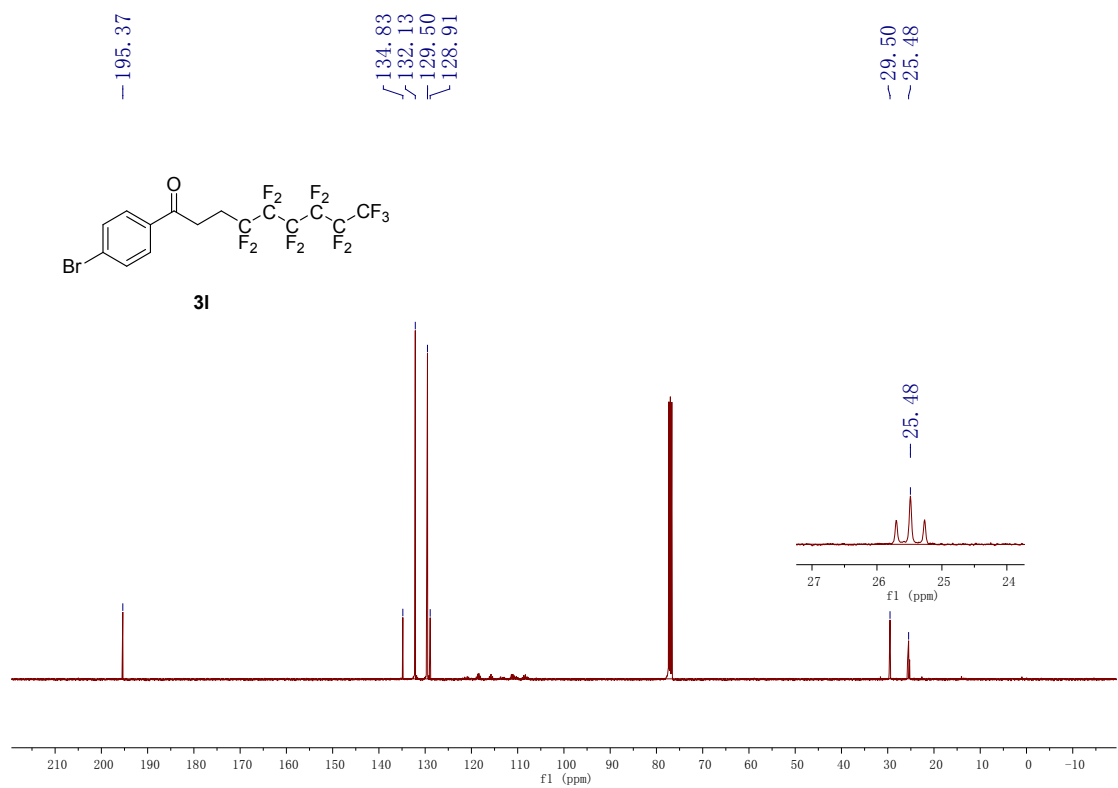

$^1\text{H}$  NMR:

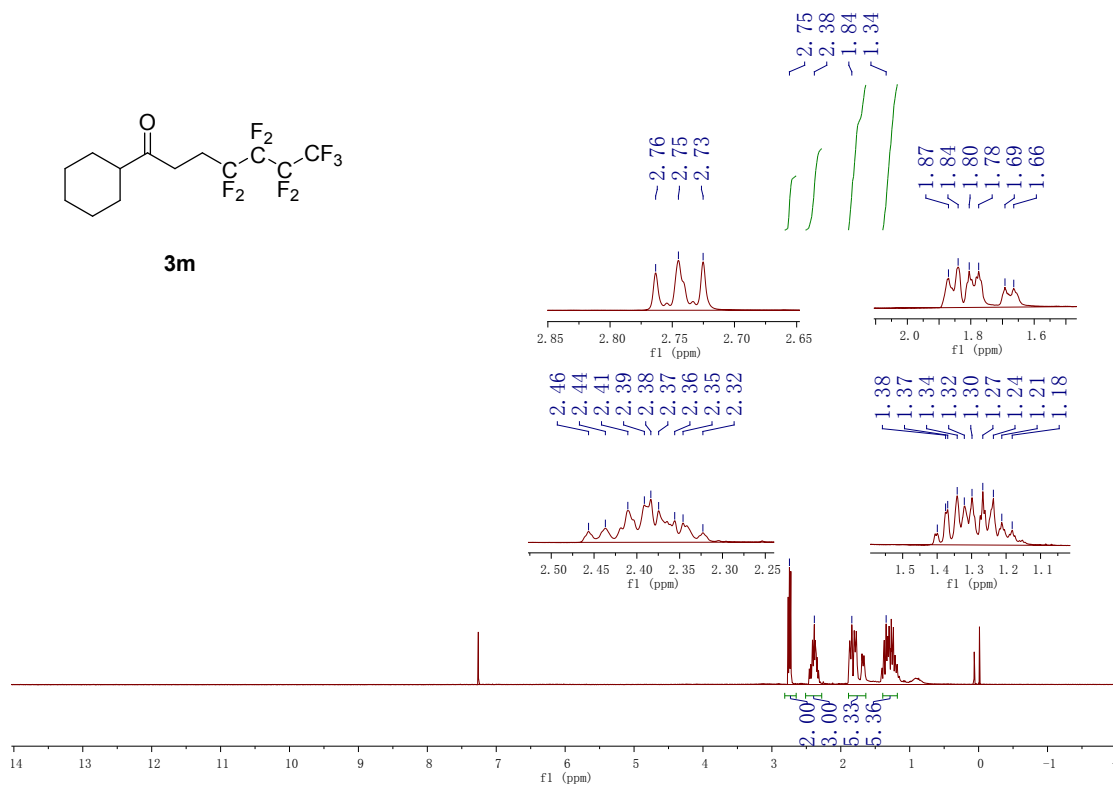

<sup>19</sup>F NMR:

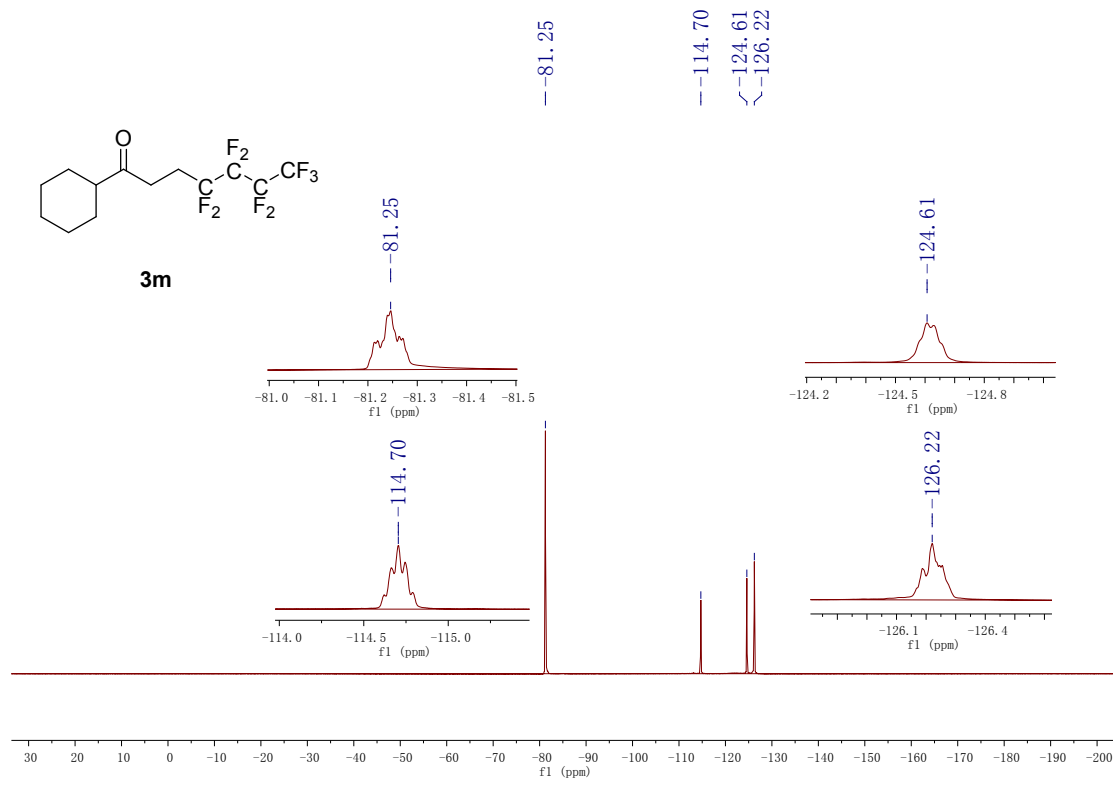

<sup>13</sup>C NMR:

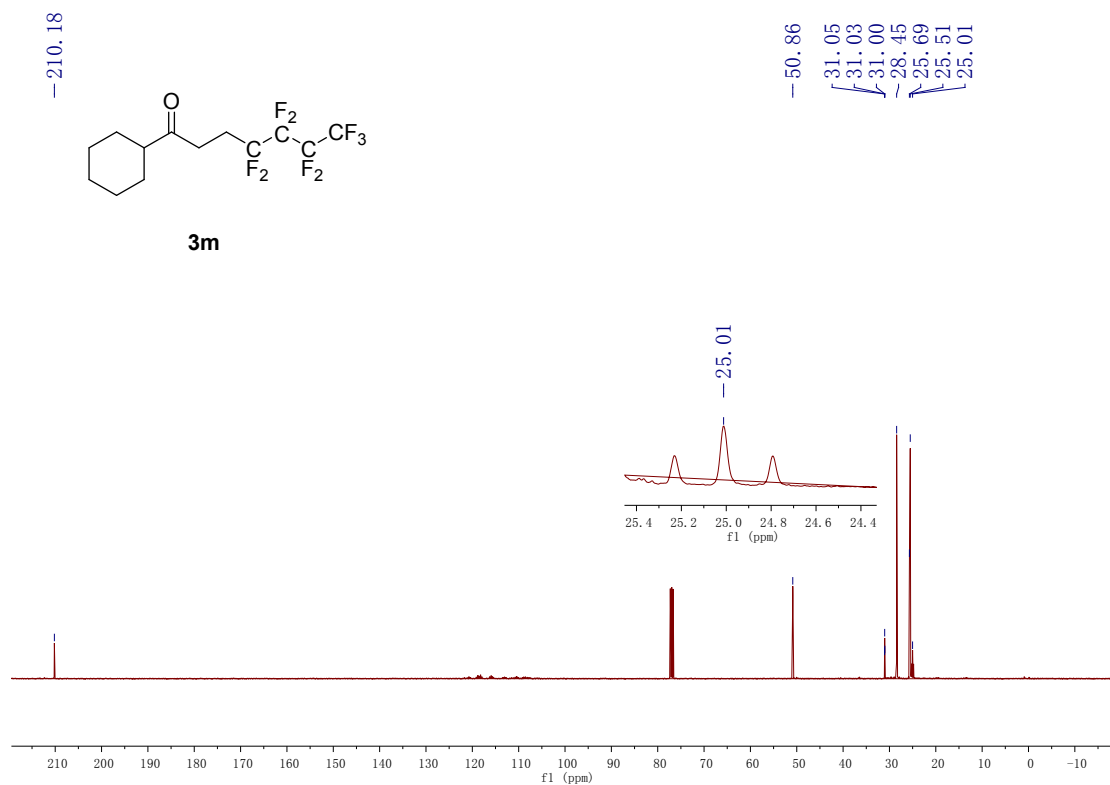

<sup>1</sup>H NMR:

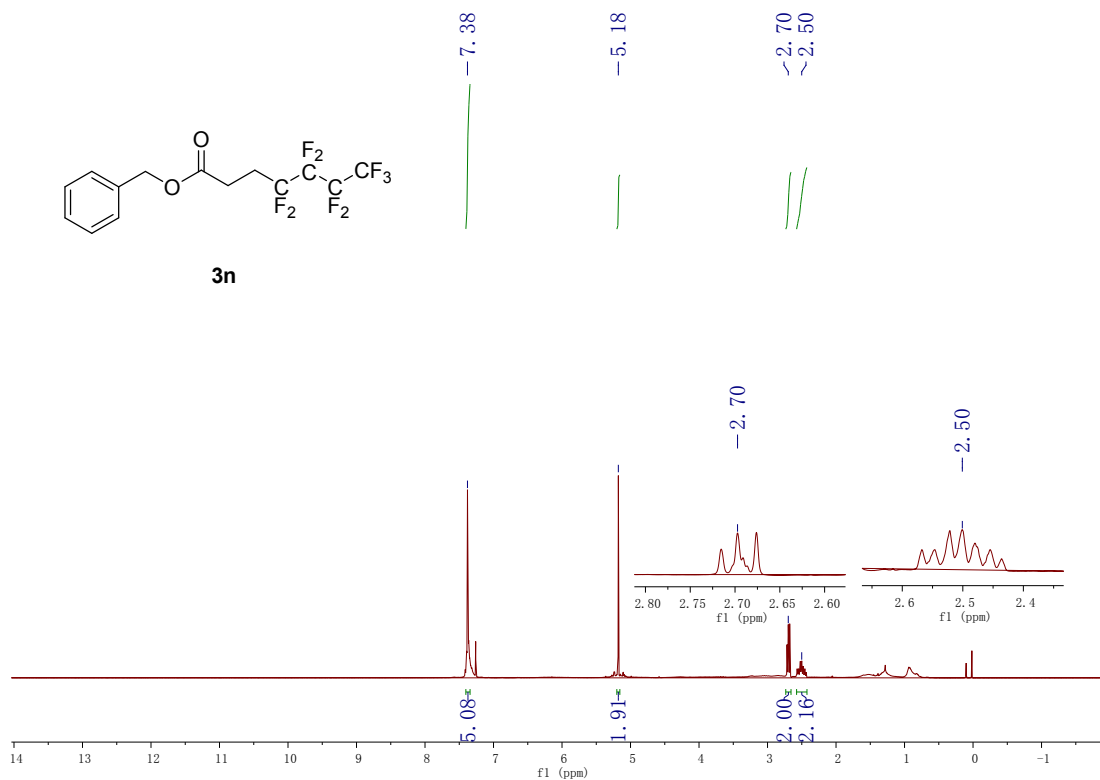

<sup>19</sup>F NMR:

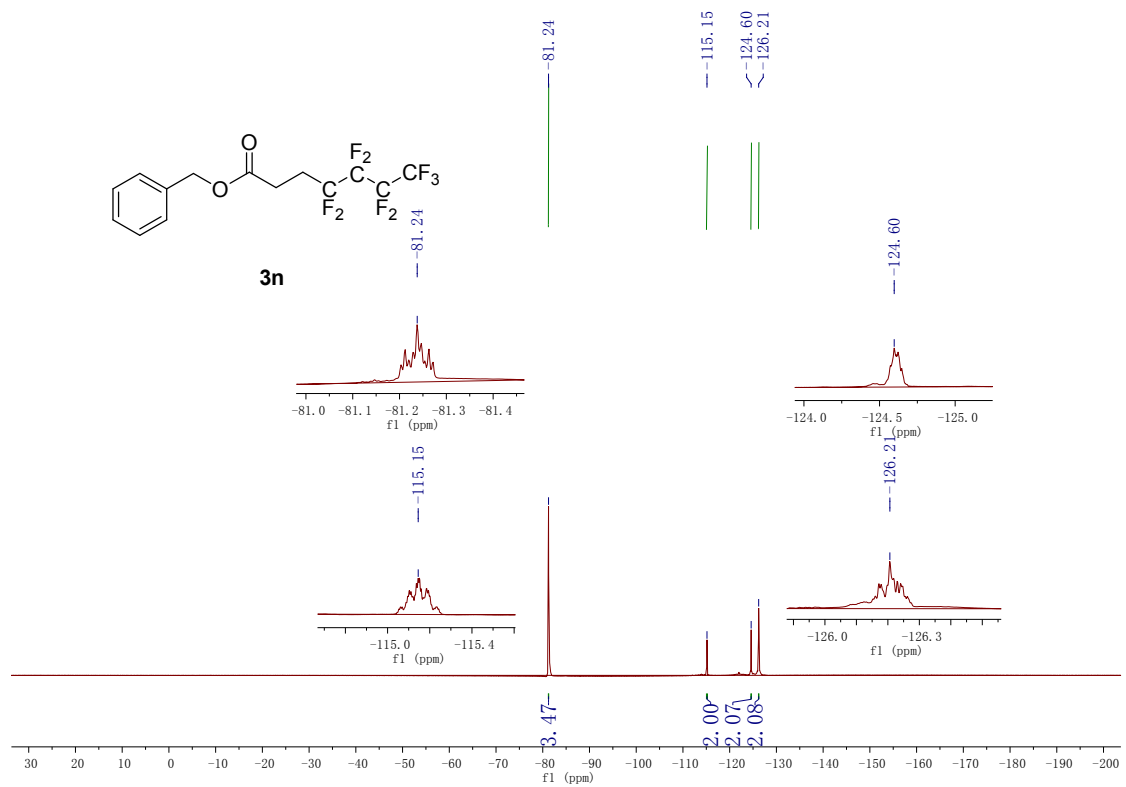

$^{13}\text{C}$  NMR:

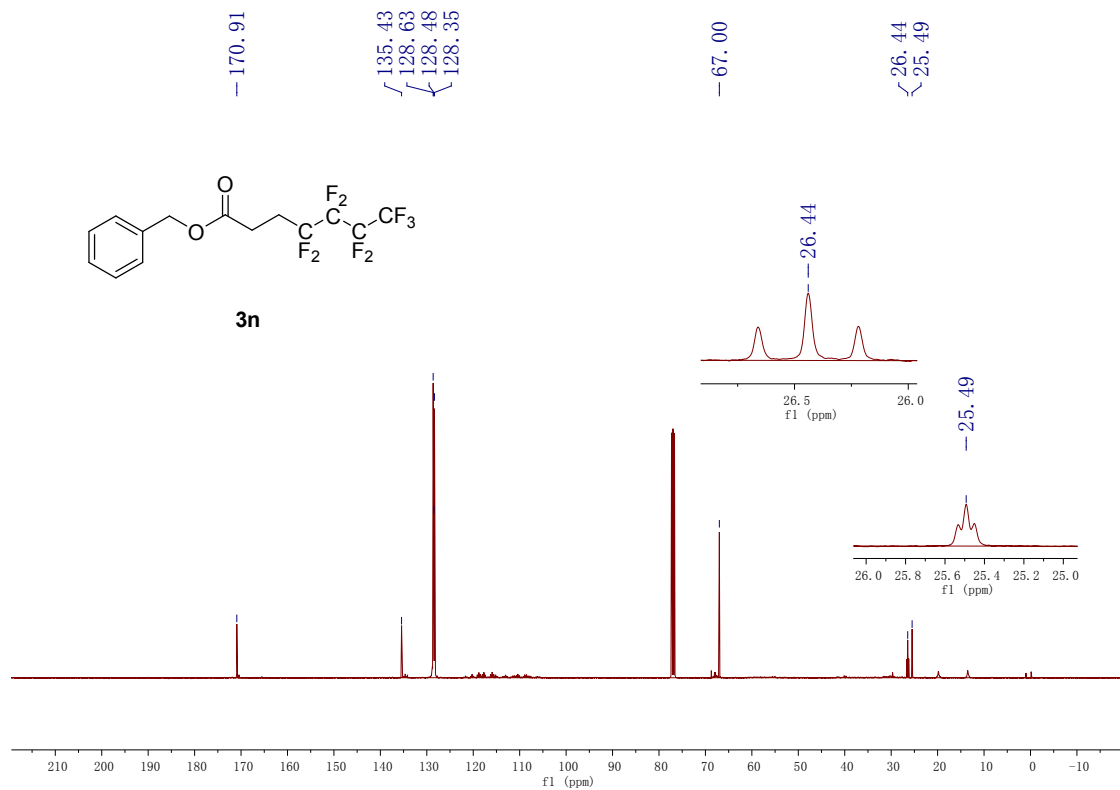

Supplement: c6ra11557h1.pdf [file c6ra11557h1.pdf]
